# Supplementary material for: Sinulolides A–H, New Cyclopentenone and Butenolide Derivatives from Soft Coral Sinularia sp
Source: MDPI journal article supplement (doi:10.3390/md12105316), 2014-10-23

## Supplementary Information

Figure S1.  $^1\text{H}$  NMR Spectrum (500 MHz) of compound **1** in  $\text{CDCl}_3$ .

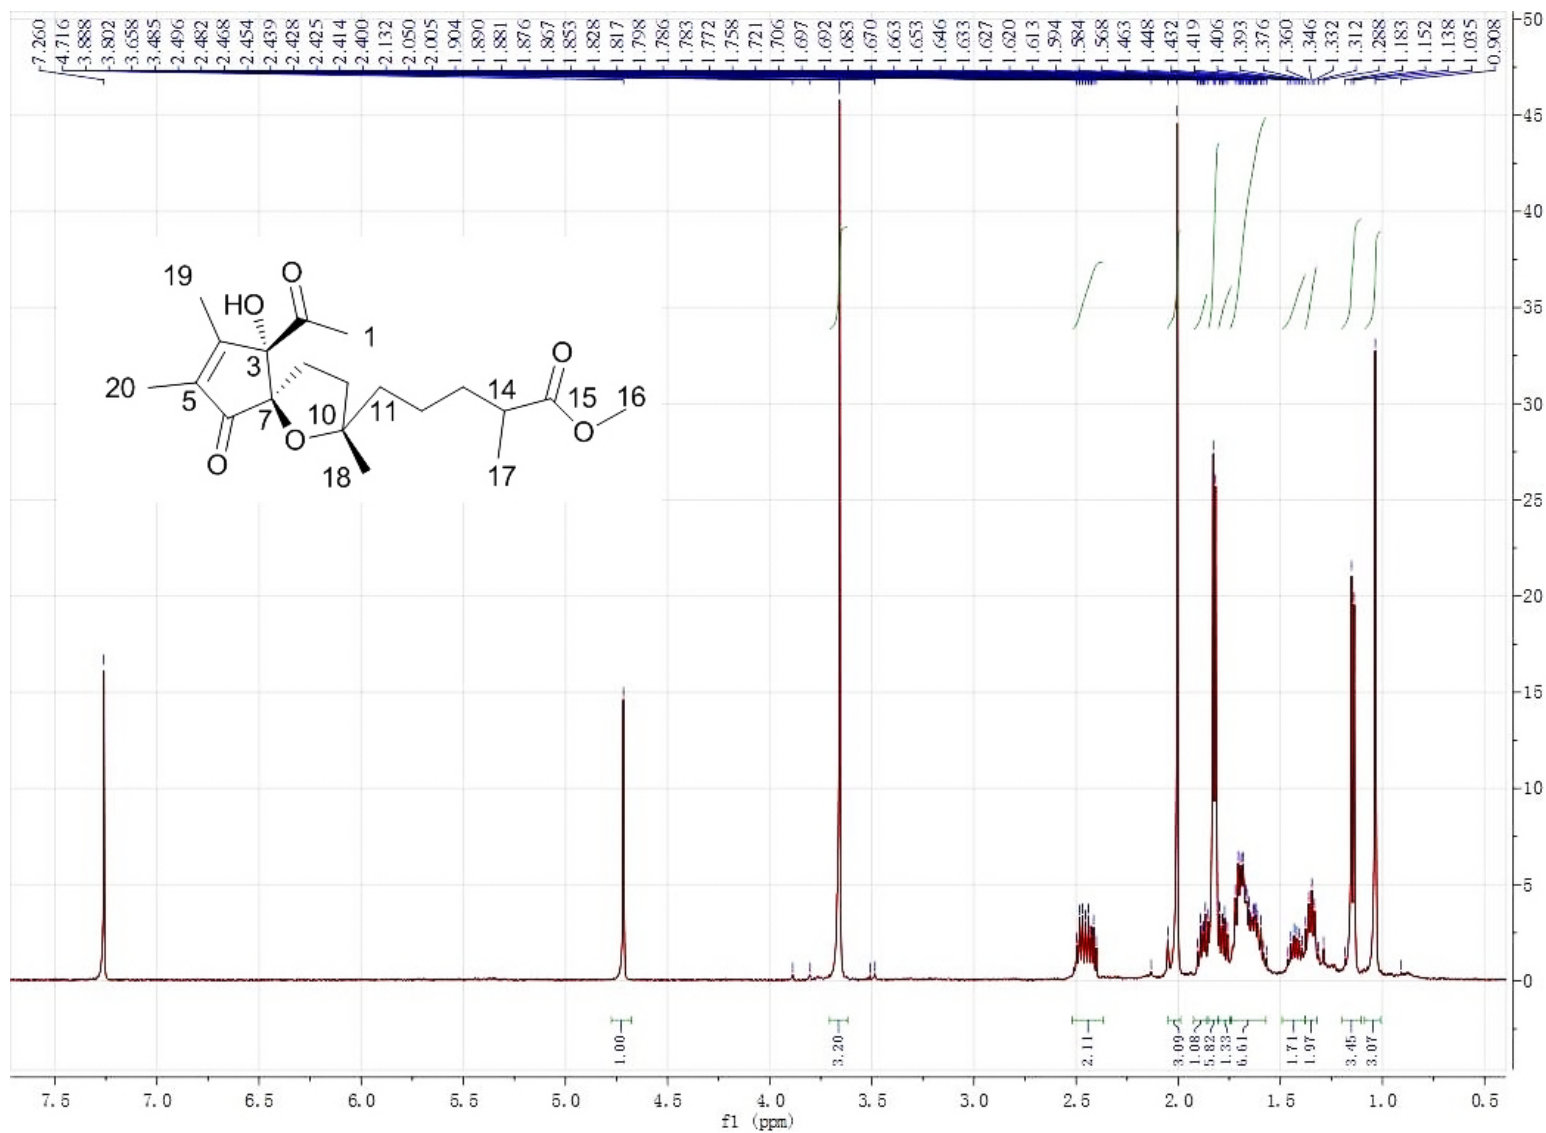

**Figure S2.**  $^{13}\text{C}$  NMR Spectrum (125 MHz) of compound **1** in  $\text{CDCl}_3$ .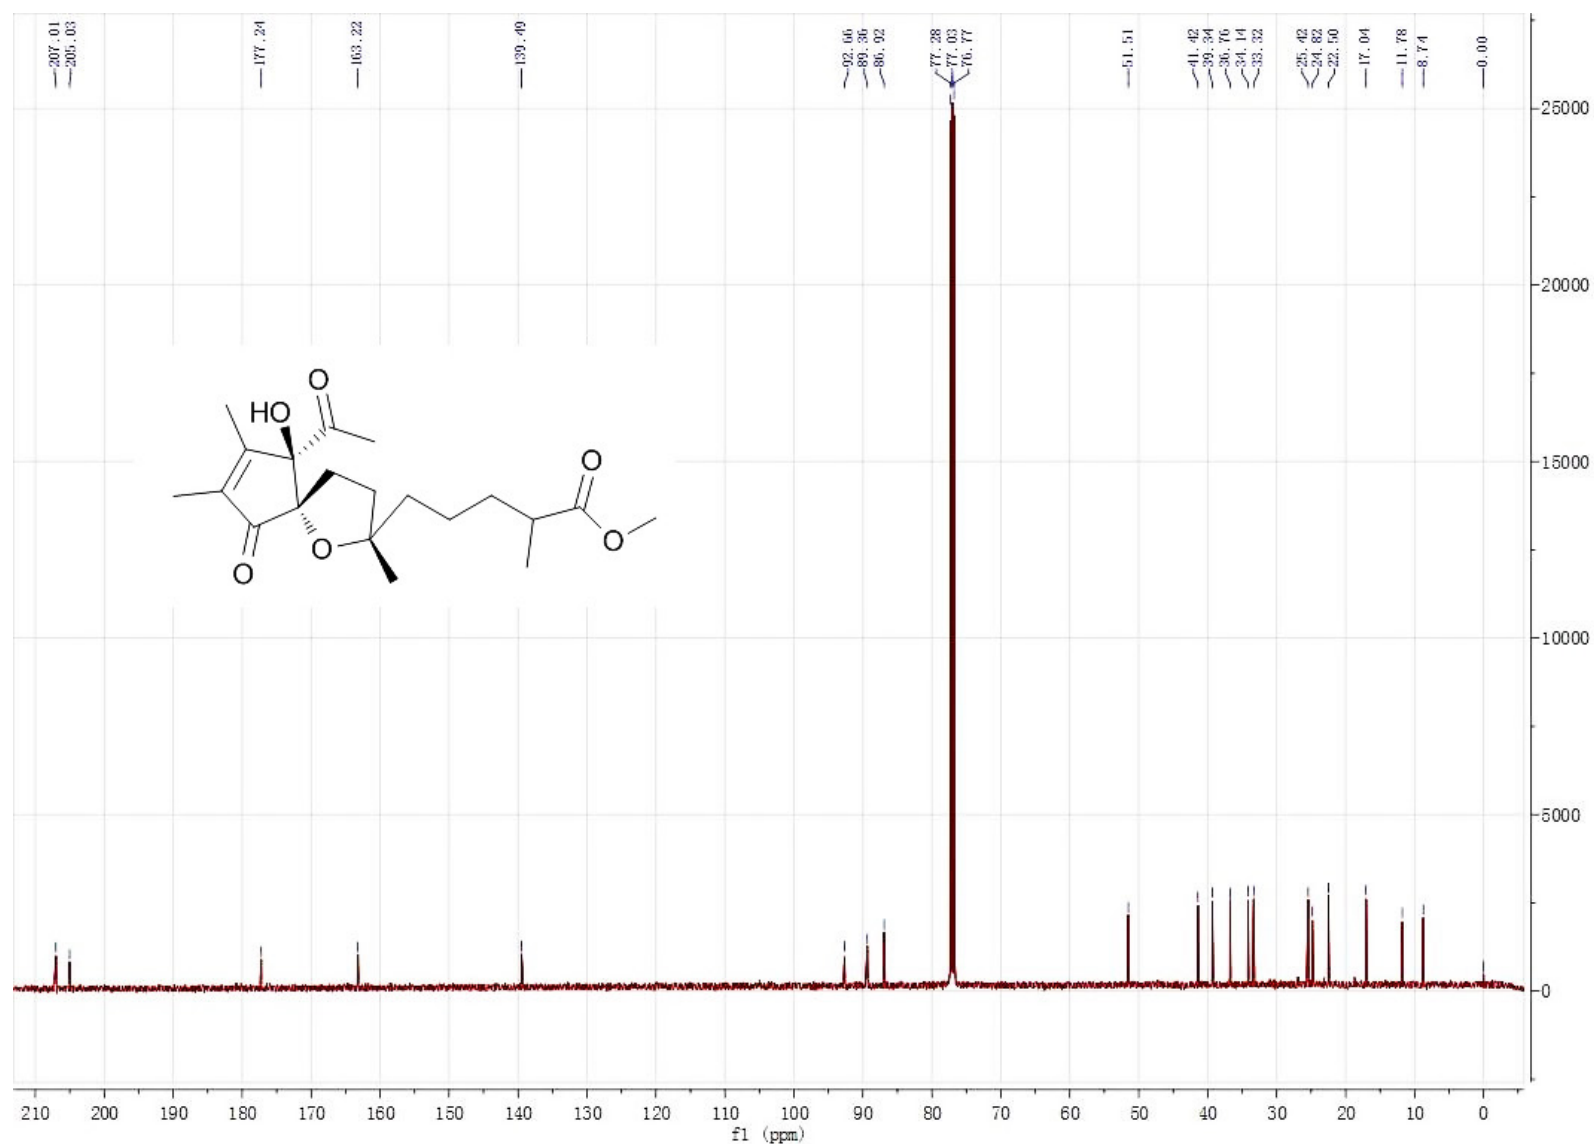

**Figure S3.**HSQC Spectrum of compound1 in CDCl<sub>3</sub>.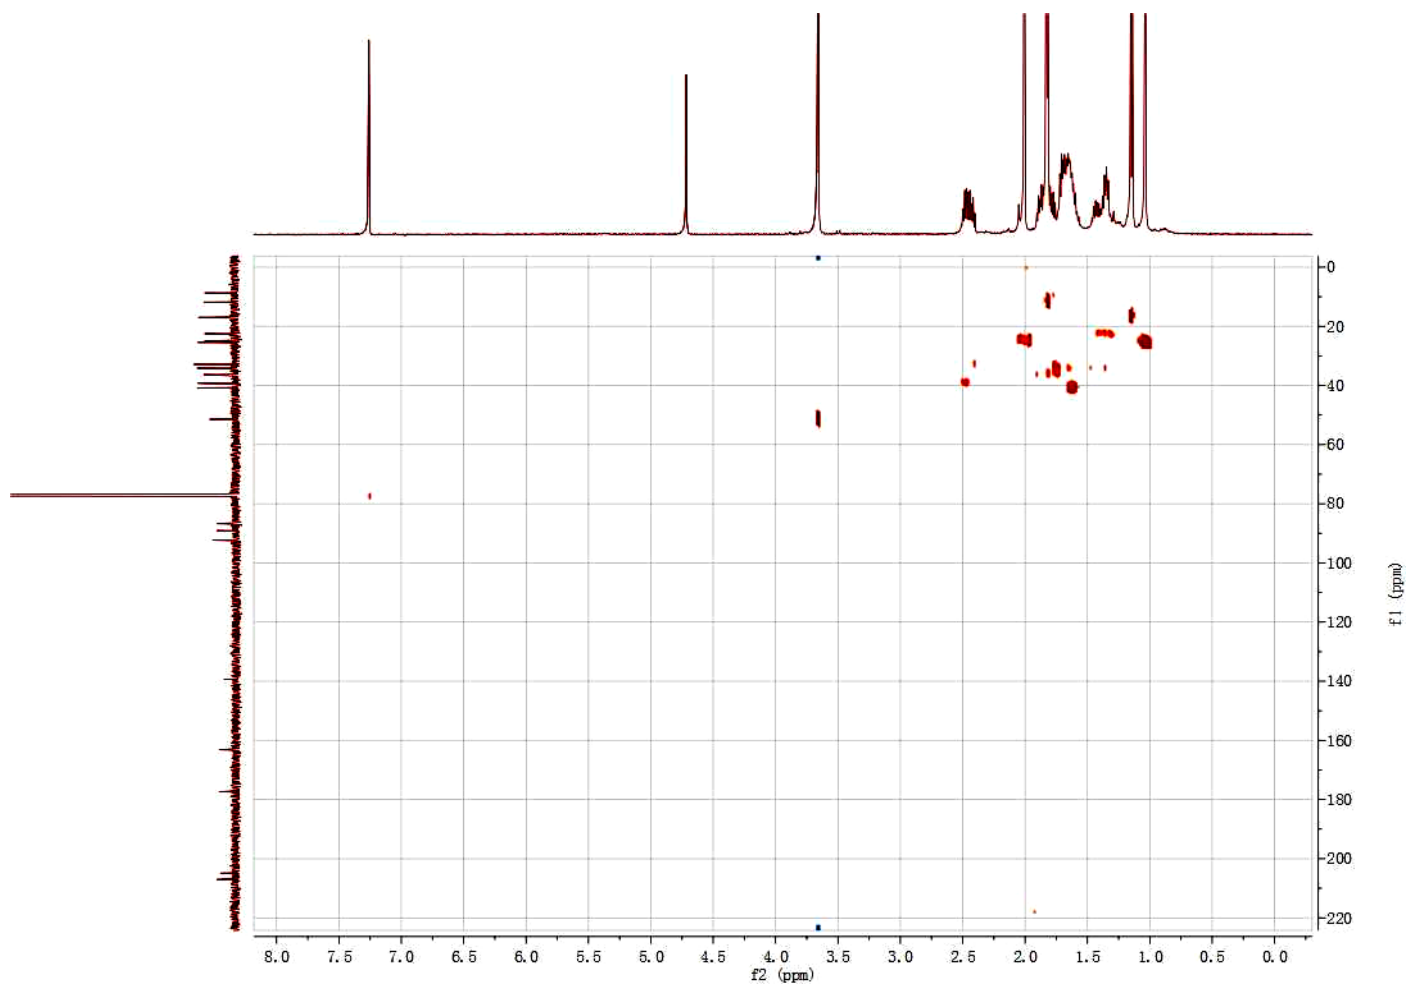

**Figure S4.** HMBC Spectrum of compound **1** in CDCl<sub>3</sub>.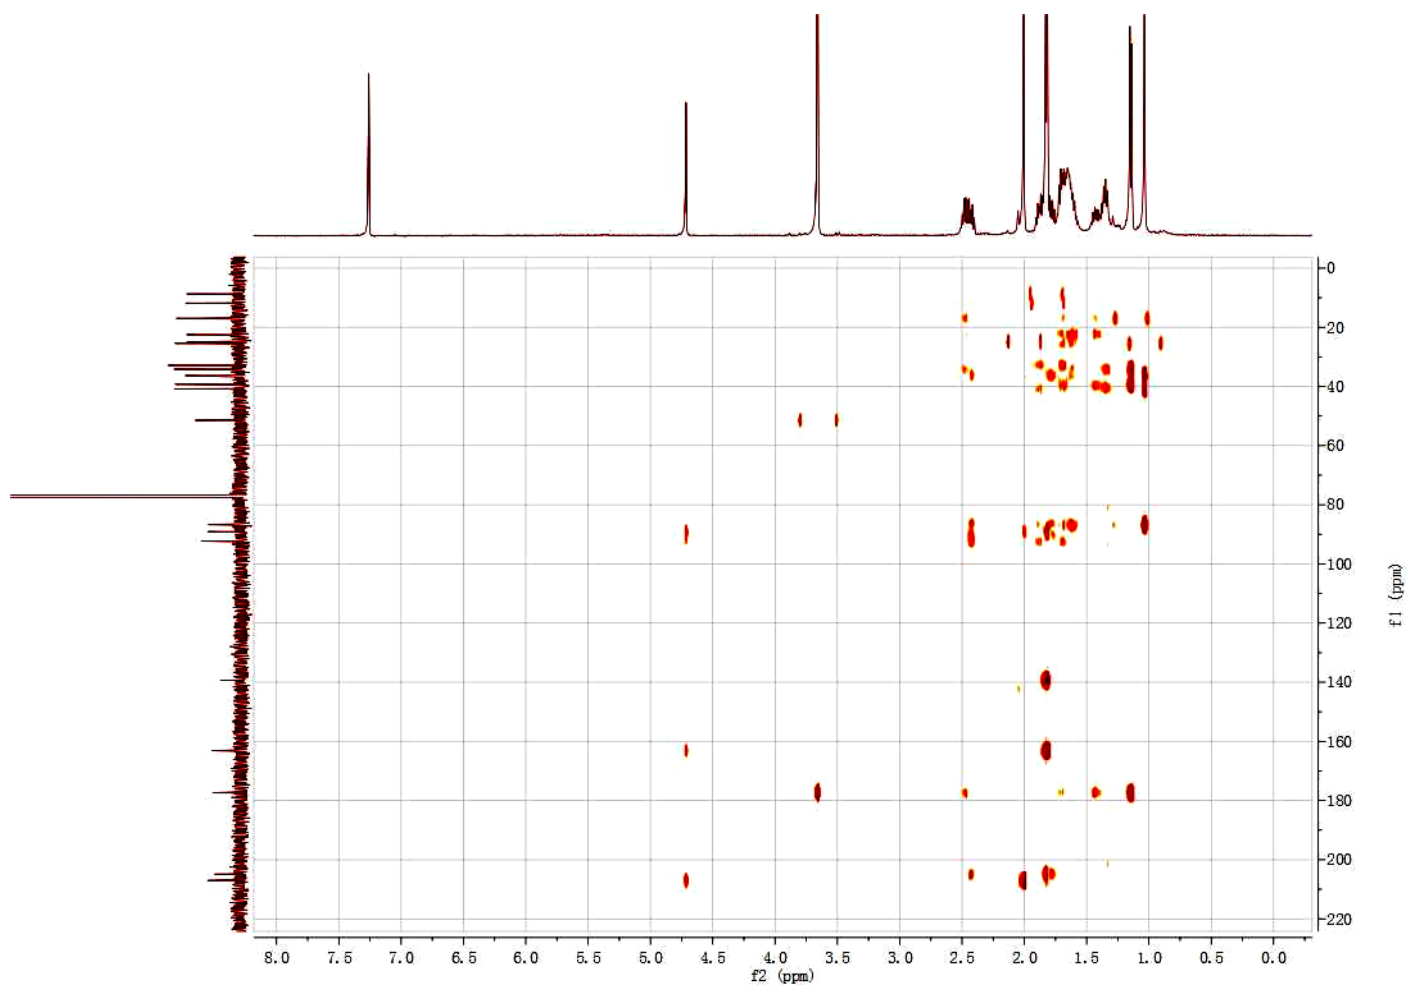

**Figure S5.**NOESY Spectrum of compound **1** in CDCl<sub>3</sub>.

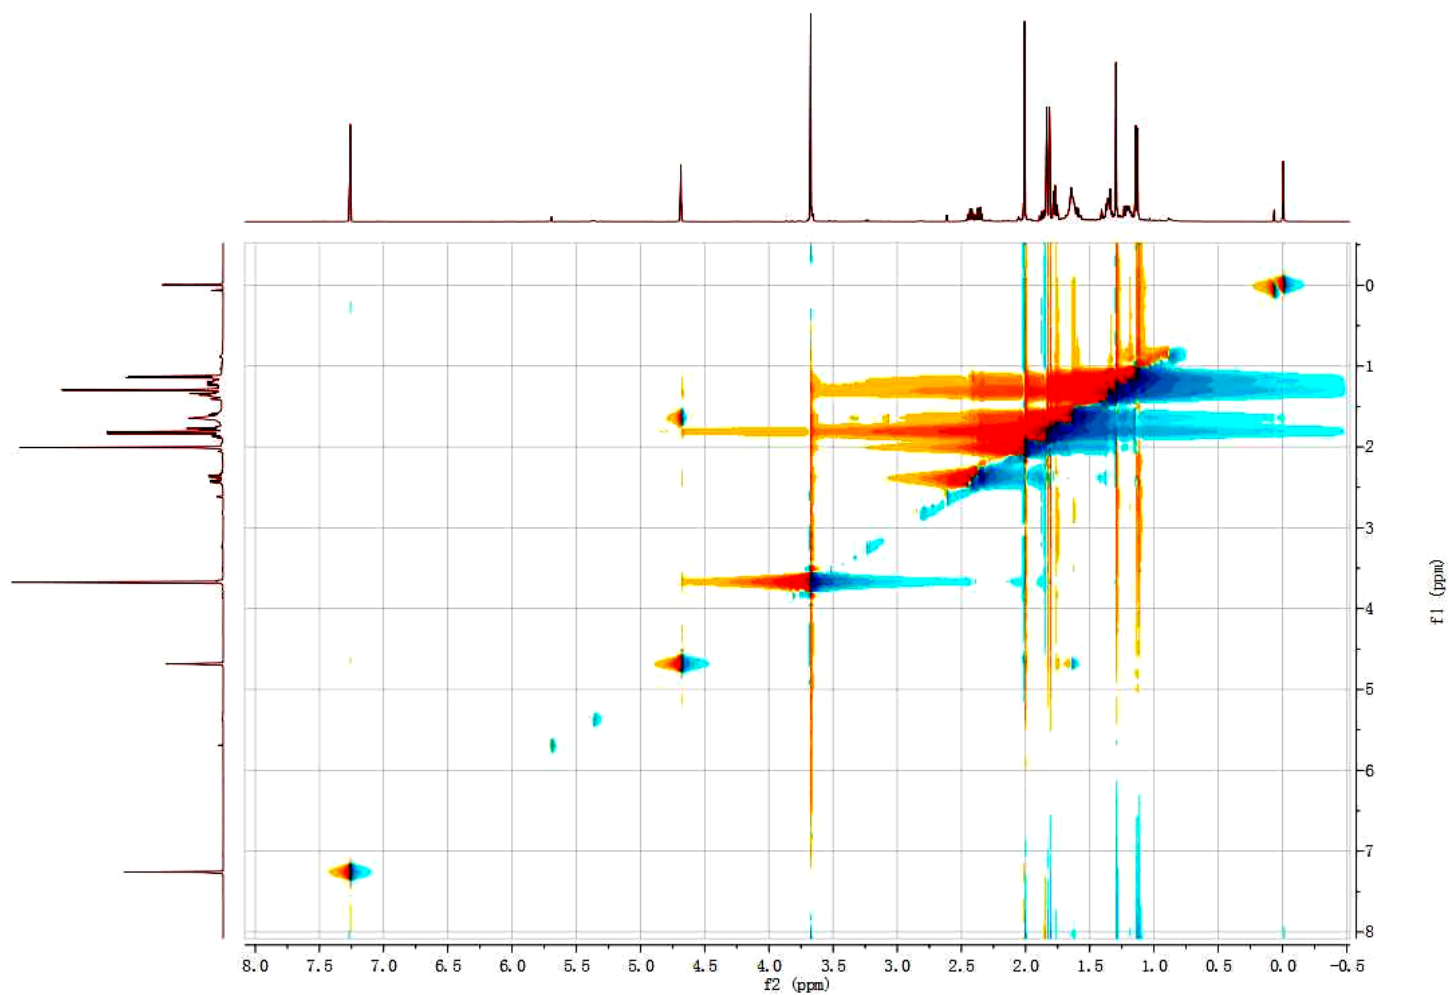

Figure S6. HRESIMS spectrum of compound 1.

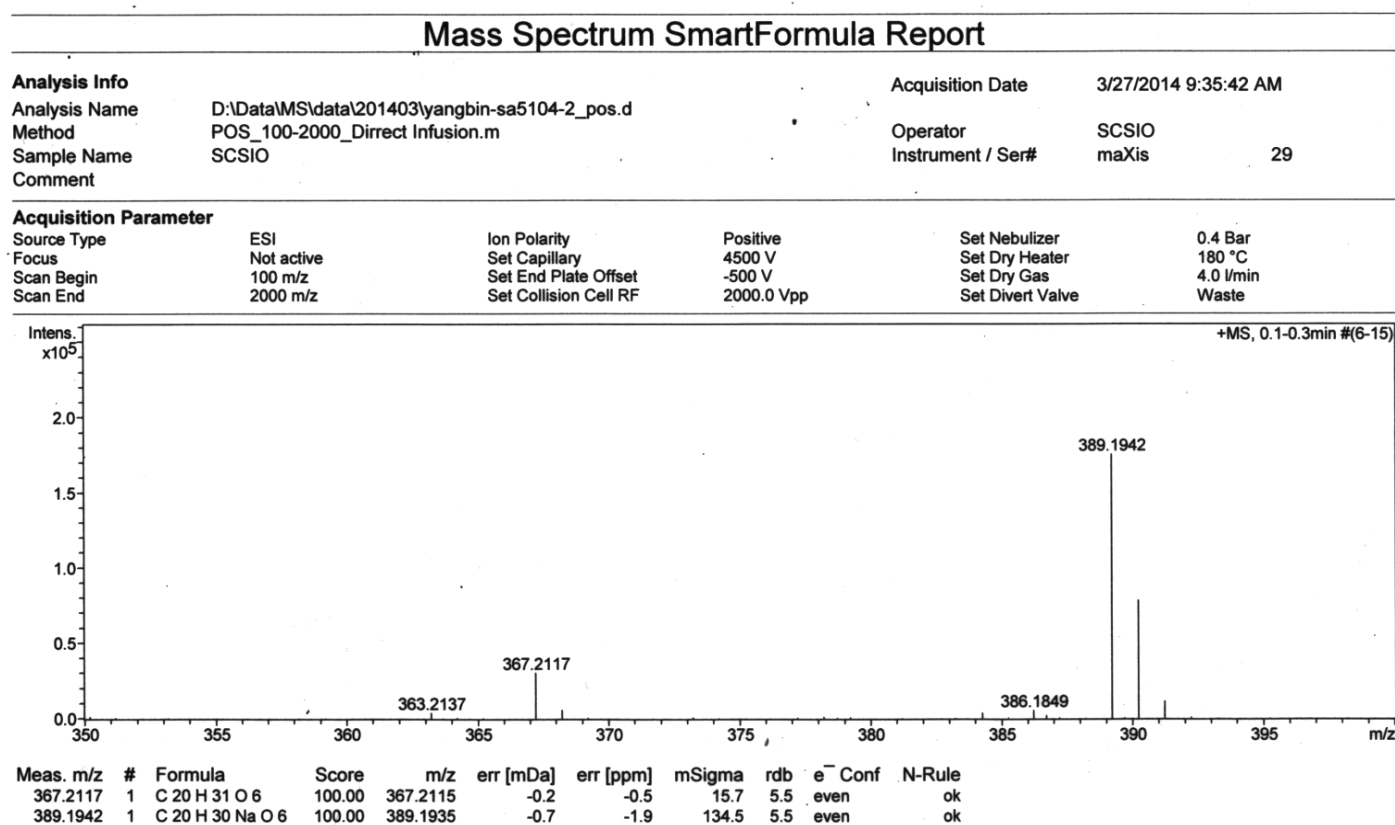

**Figure S7.**  $^1\text{H}$  NMR Spectrum (500 MHz) of compound **2** in  $\text{CDCl}_3$ .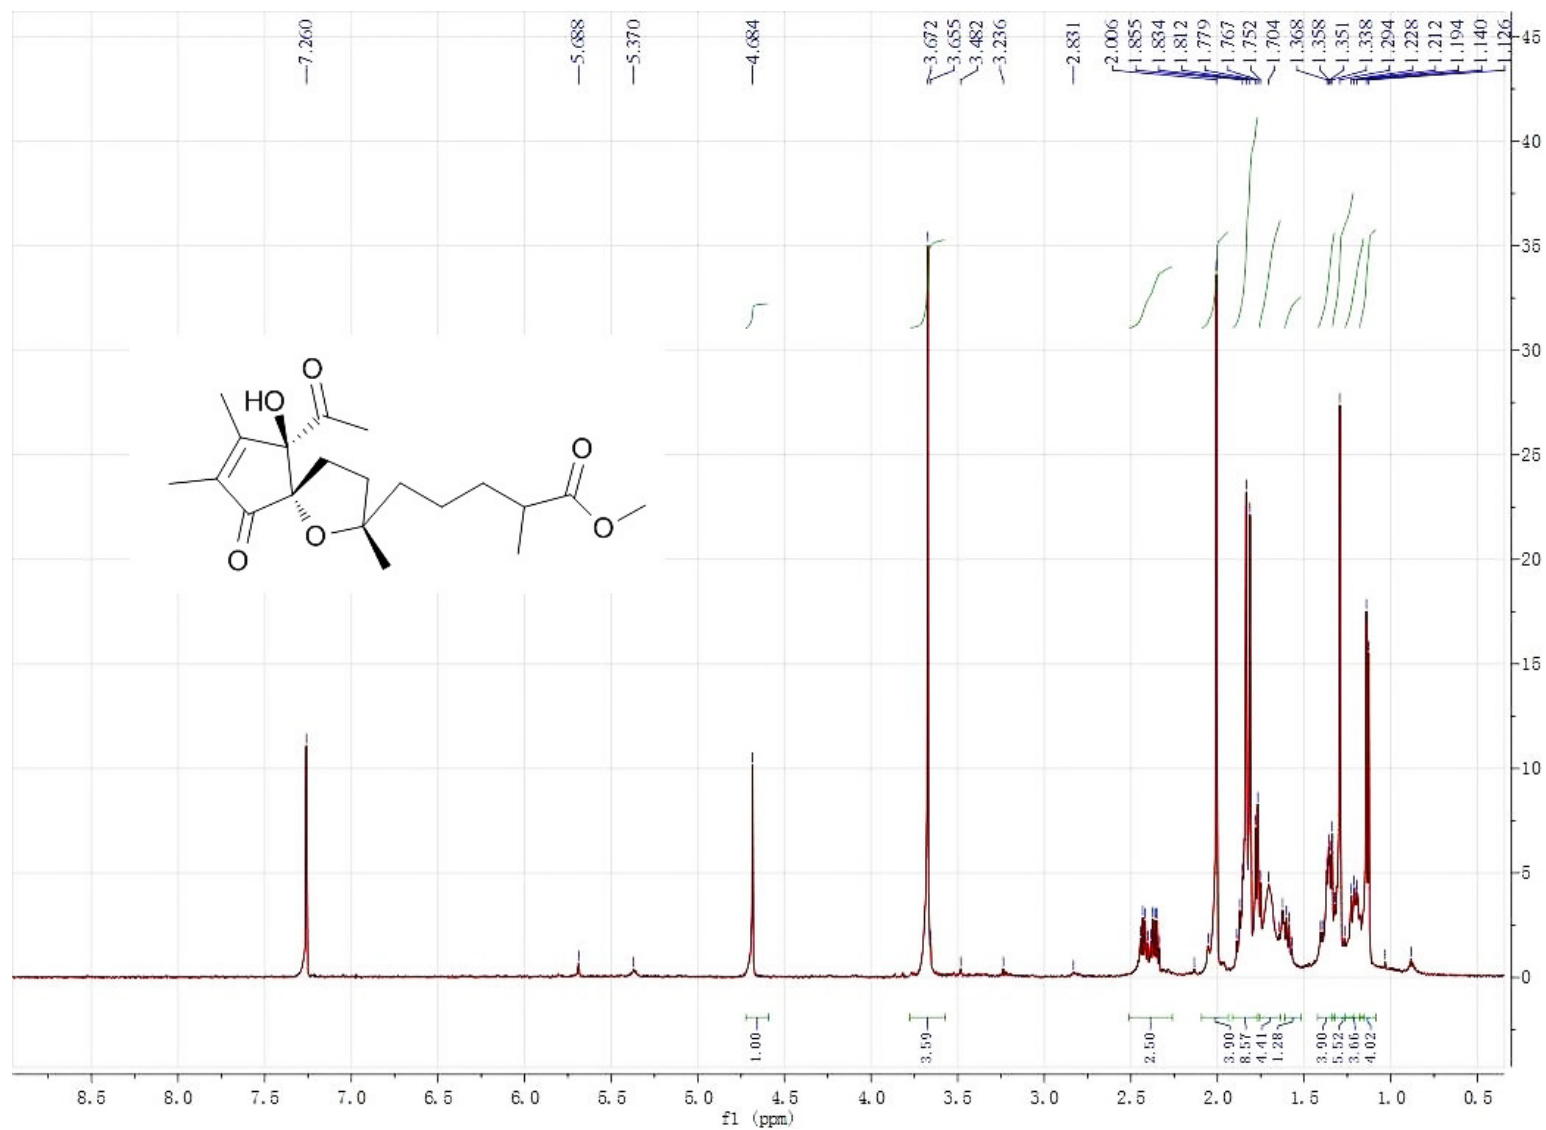

**Figure S8.**  $^{13}\text{C}$  NMR Spectrum (125 MHz) of compound **2** in  $\text{CDCl}_3$ .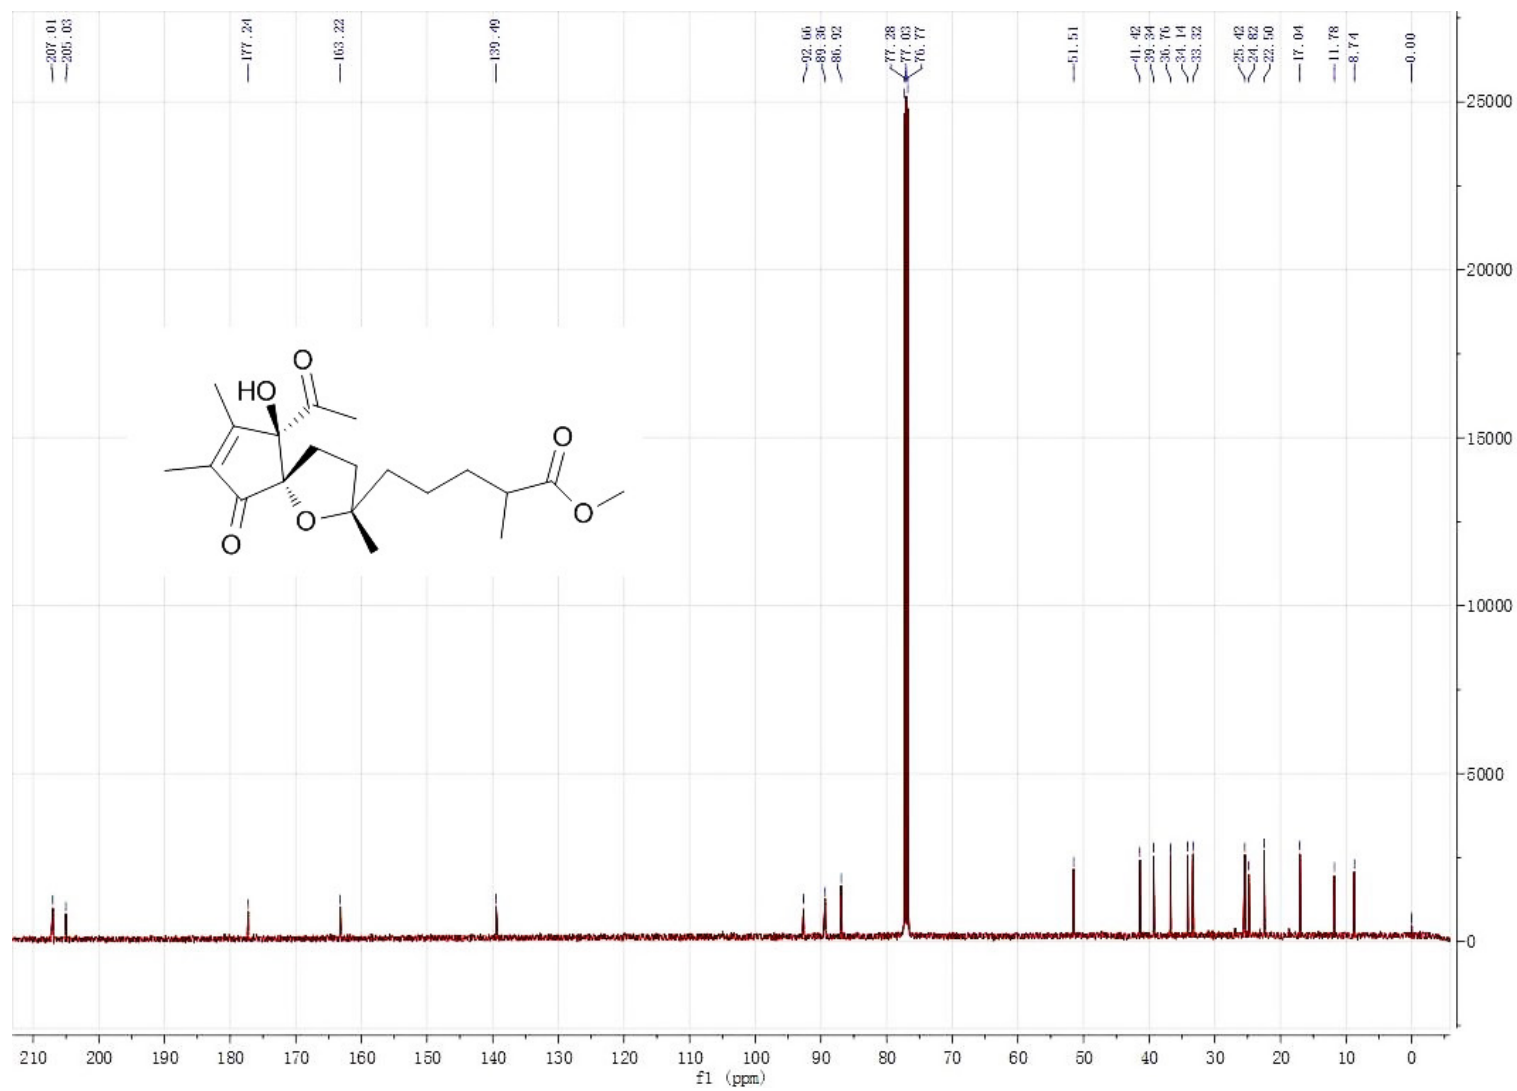



**Figure S9.** HSQC Spectrum of compound **2** in CDCl<sub>3</sub>.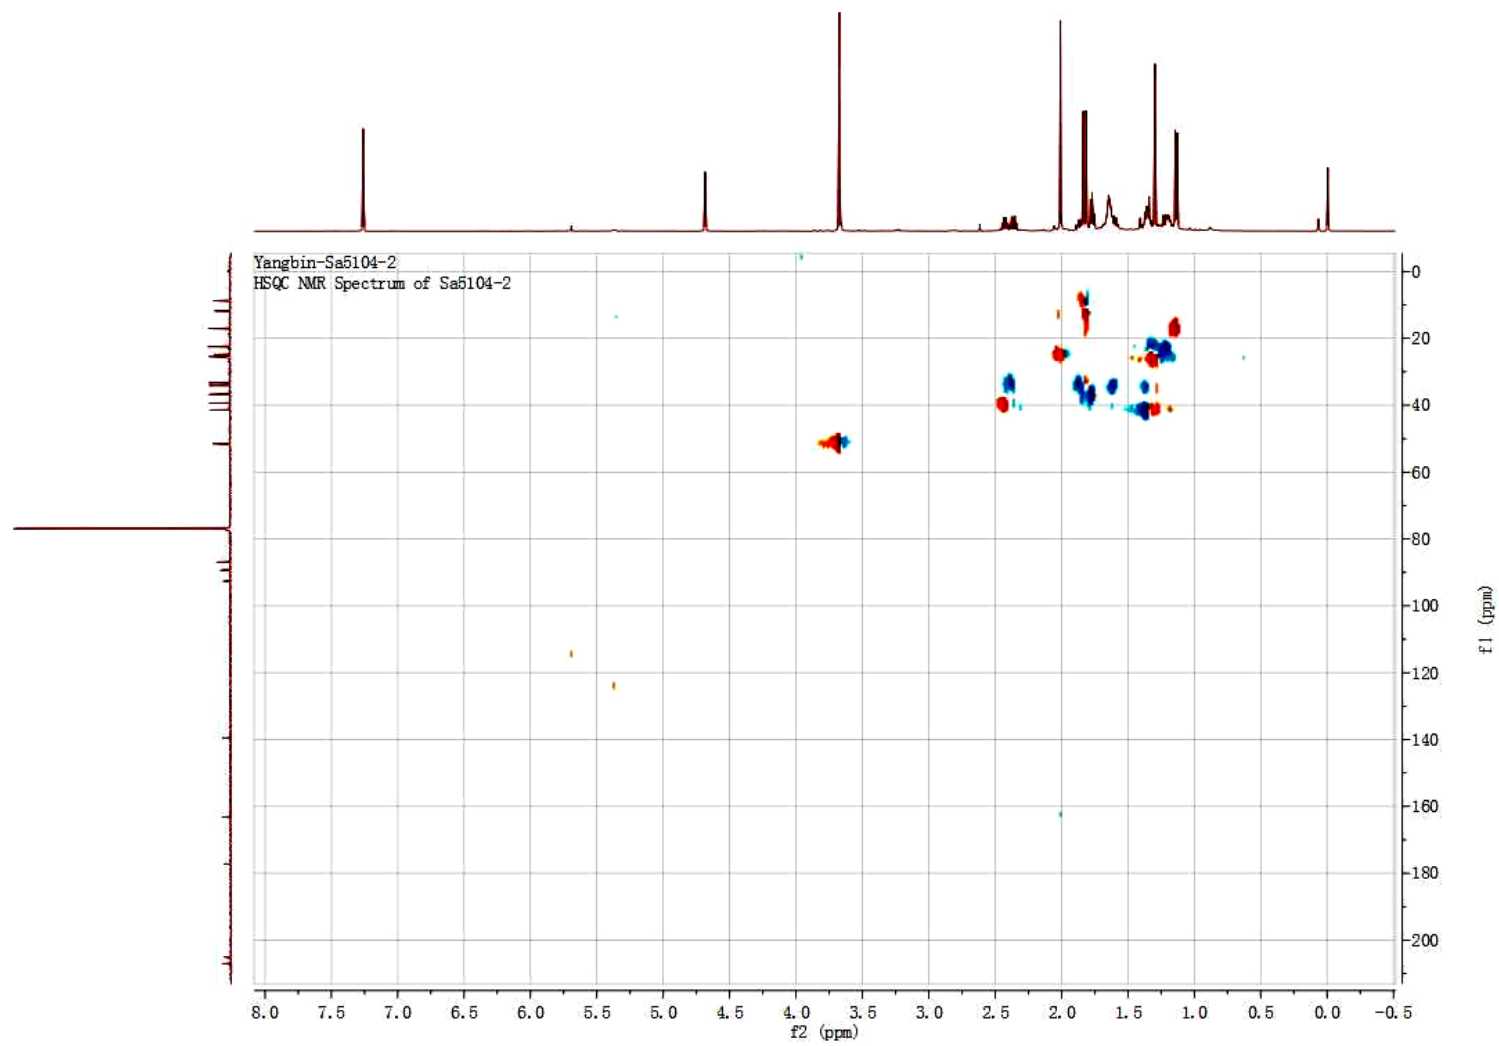

**Figure S10.** HMBC Spectrum of compound **2** in CDCl<sub>3</sub>.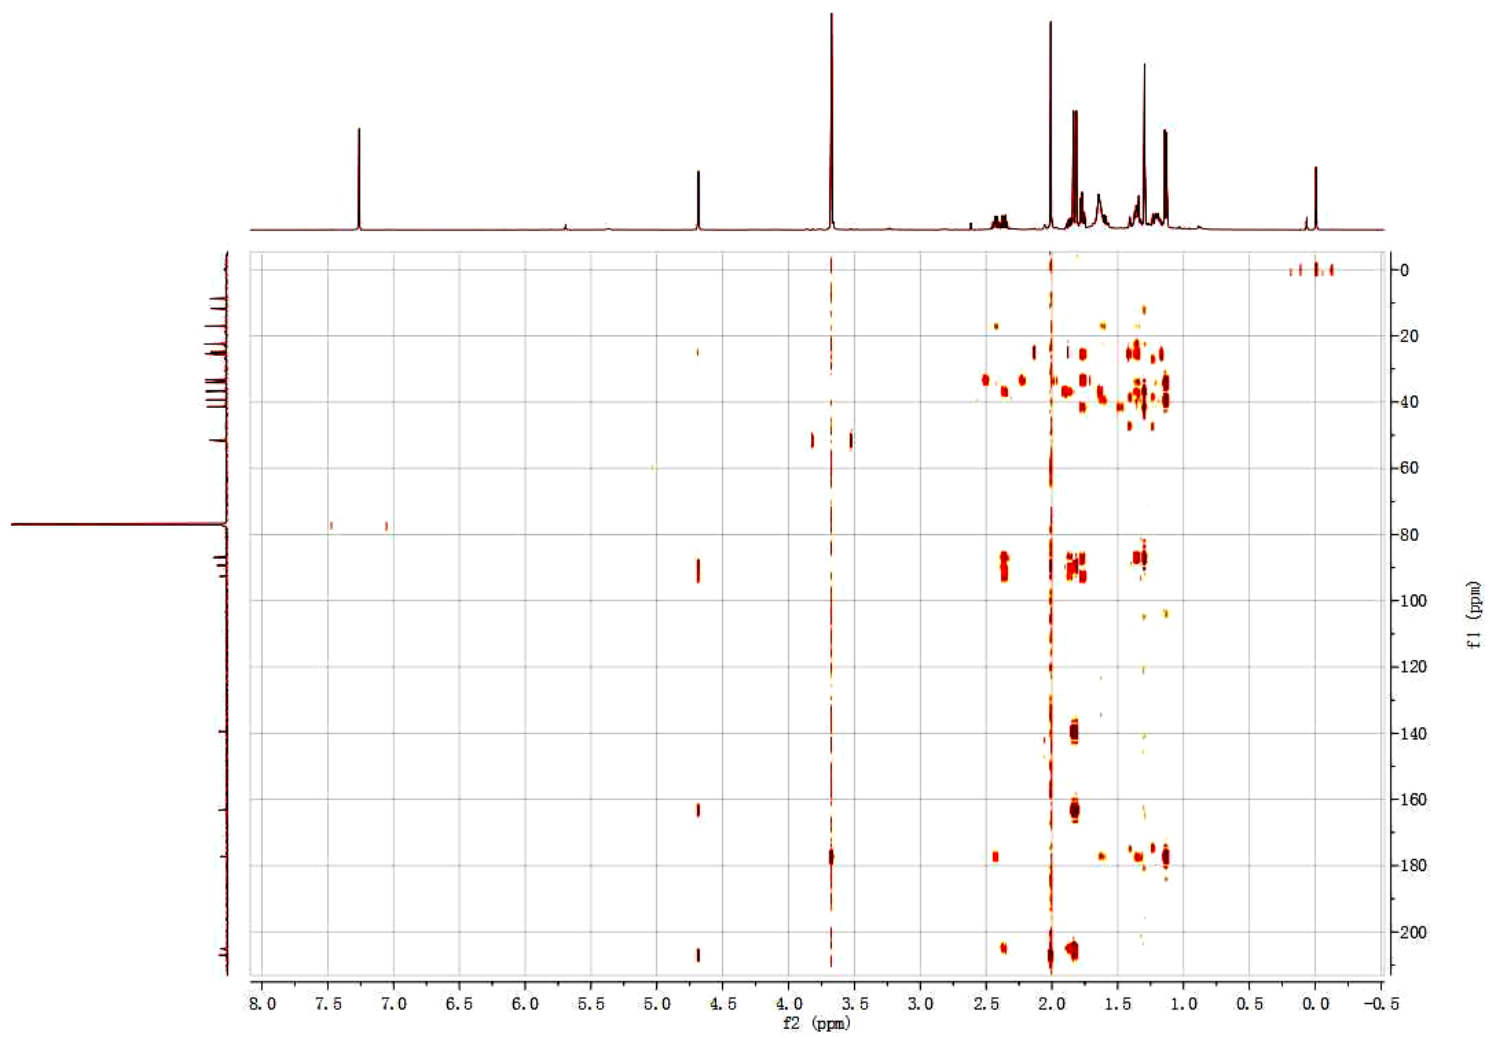

Figure S11. ESIMS Spectrum of compound 2.

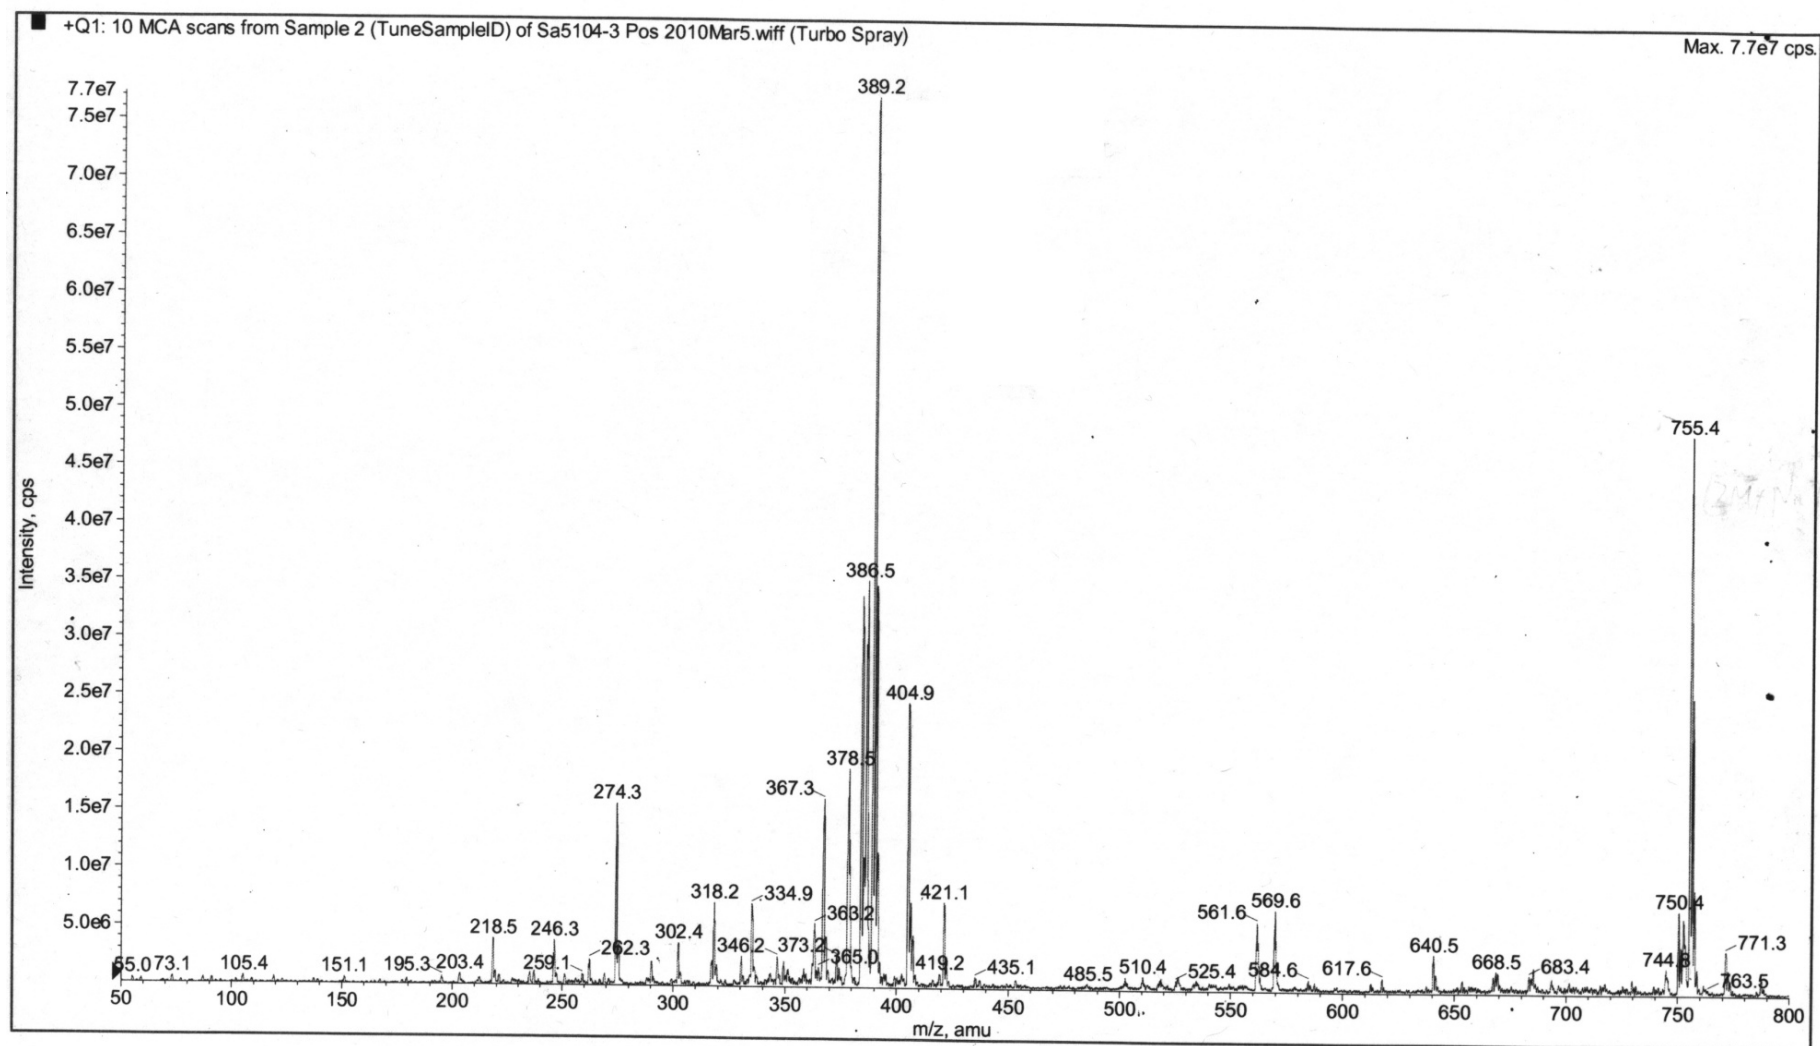

**Figure S12.** CD Spectrum of compound 1 and 2.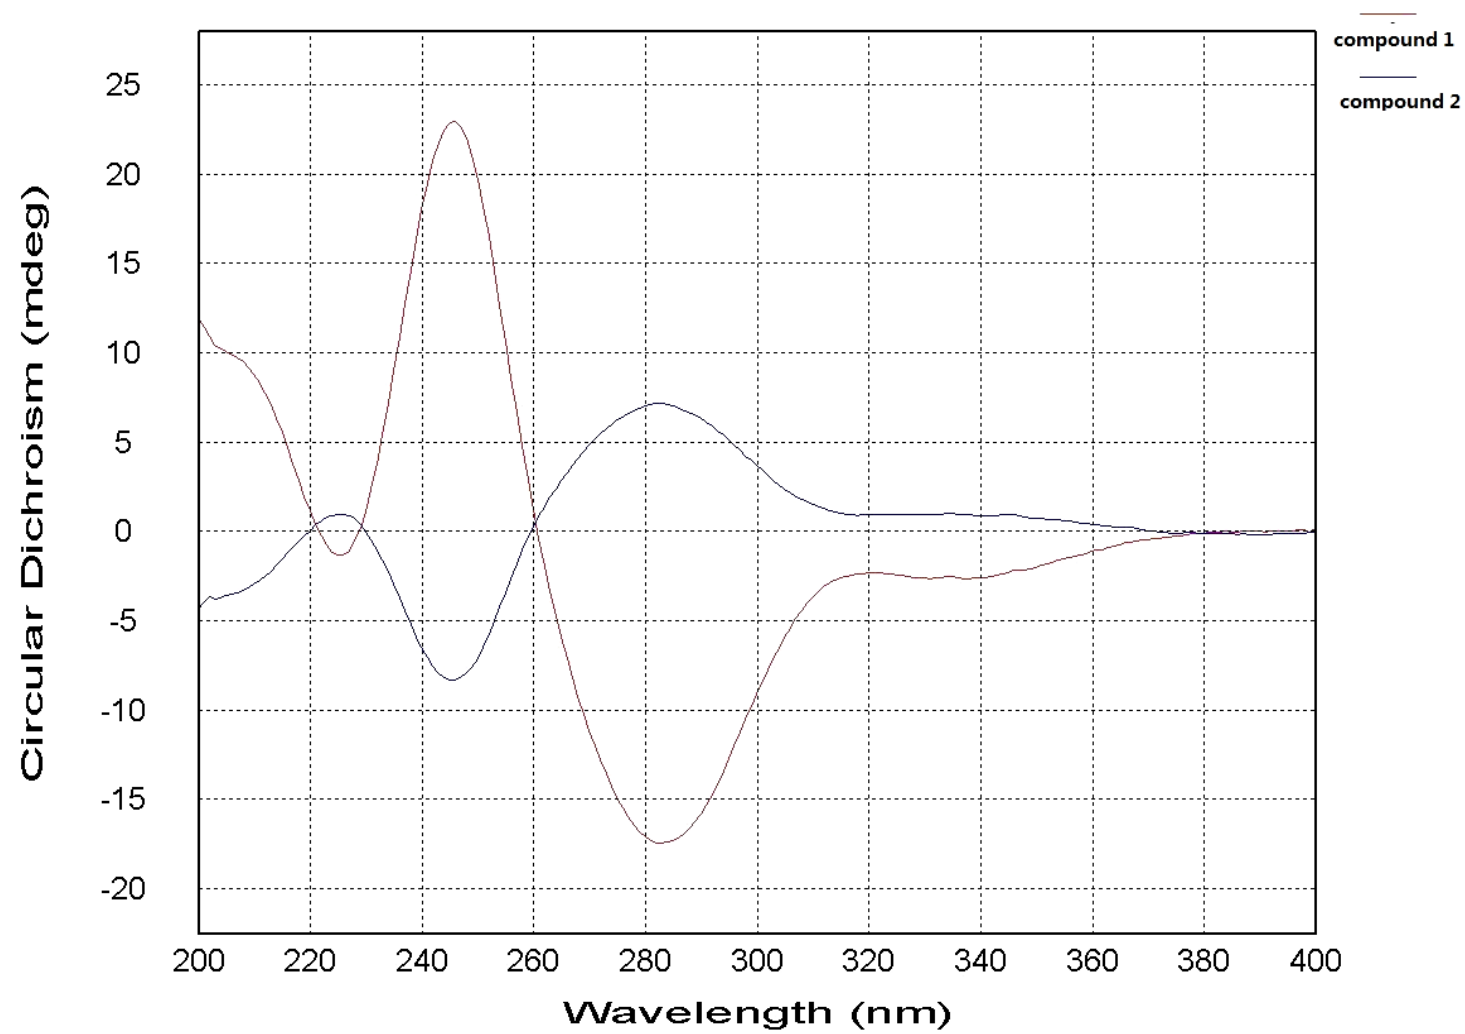

**Table S1.** Relative and free energies <sup>a</sup> and equilibrium populations <sup>b</sup> of low-energy conformers of **1** and **2** in MeOH.

| Conformer                                                | $\Delta E$ | $\Delta G$ | P (%) |
|----------------------------------------------------------|------------|------------|-------|
| Compound <b>1</b> (3 <i>S</i> ,7 <i>R</i> ,10 <i>S</i> ) |            |            |       |
| <b>1a</b>                                                | 0.0        | 0.0        | 32.8  |
| <b>1b</b>                                                | 0.017      | 0.170      | 24.5  |
| <b>1c</b>                                                | 0.021      | 0.332      | 18.6  |
| <b>1d</b>                                                | 0.170      | 0.397      | 16.6  |
| <b>1e</b>                                                | 1.046      | 0.966      | 6.2   |
| <b>1f</b> <sup>c</sup>                                   | 1.064      | 1.908      | 1.2   |
| Compound <b>2</b> (3 <i>S</i> ,7 <i>R</i> ,10 <i>R</i> ) |            |            |       |
| <b>2a</b>                                                | 0.00       | 0.00       | 32.6  |
| <b>2b</b>                                                | 0.118      | 0.165      | 24.6  |
| <b>2c</b>                                                | 0.411      | 0.196      | 23.3  |
| <b>2d</b>                                                | 0.573      | 0.439      | 15.3  |
| <b>2e</b>                                                | 0.938      | 1.192      | 4.2   |

<sup>a</sup> B3LYP/6-311+G(d,p), in kcal/mol; <sup>b</sup> From  $\Delta G$  values at 298.15 K; <sup>c</sup> Conformer not used for ECD/TDDFT calculations.

**Figure S13.** Conformations of low-energy conformers of **1** and **2**.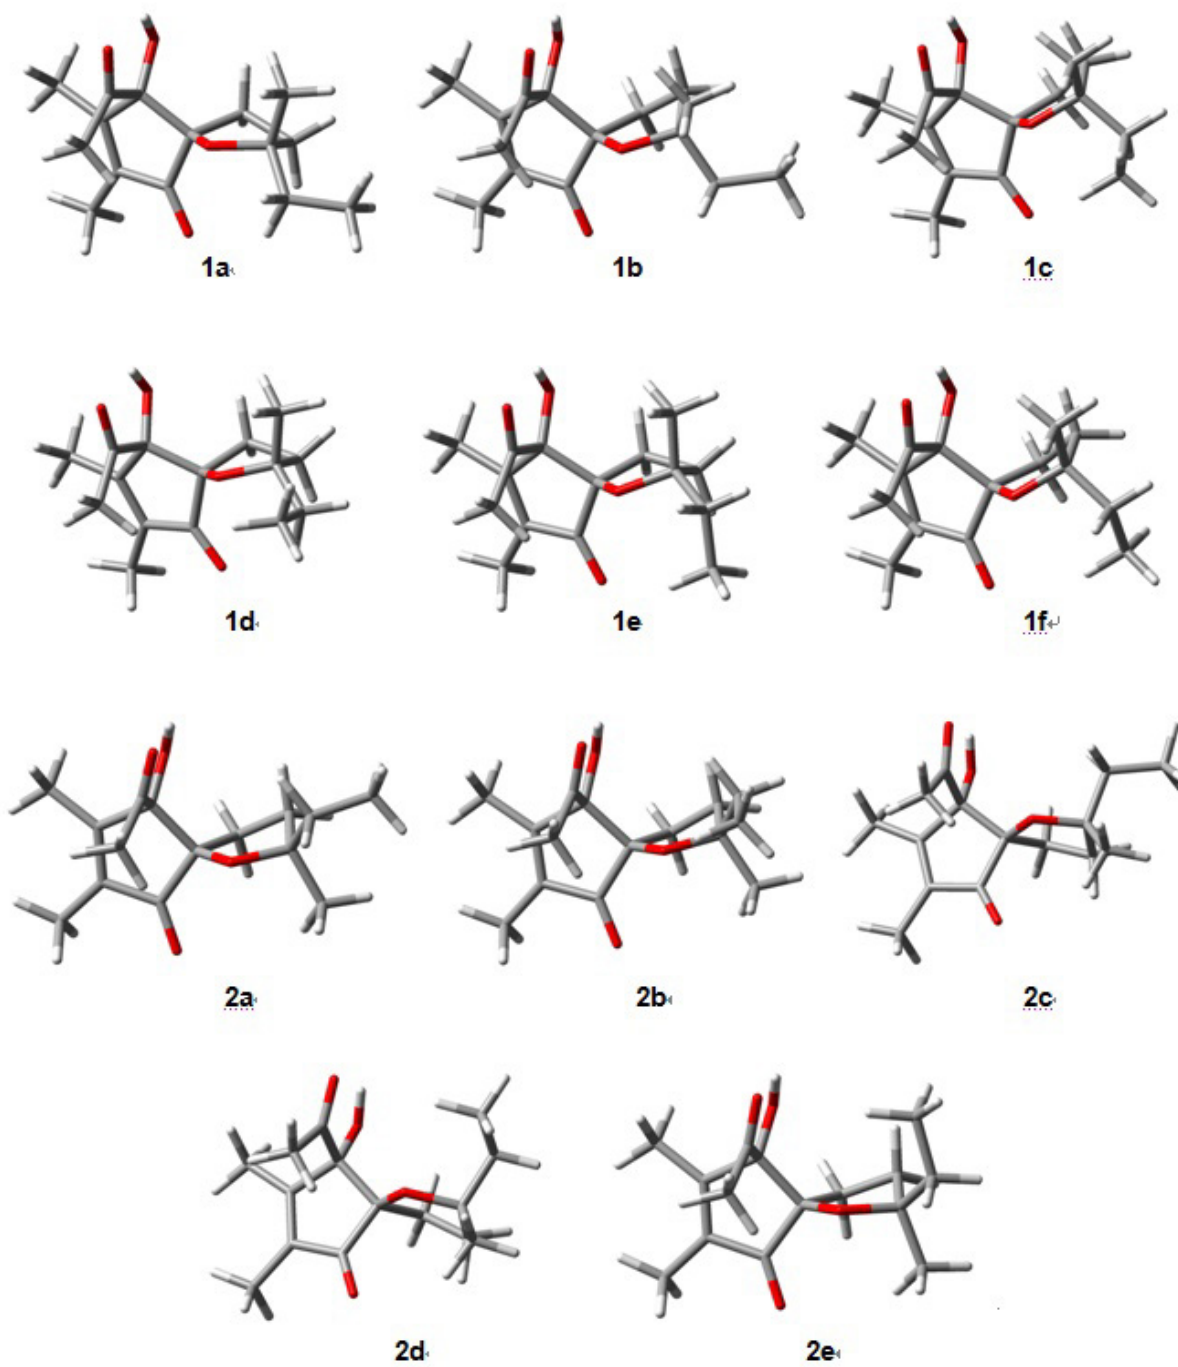

**Figure S14.** Calculated ECD Spectrum for the low-energy conformers of **1**. Vertical bars represent rotational strengths  $R$ .  $\sigma = 0.30$  eV, shift =  $\pm 0$  nm.

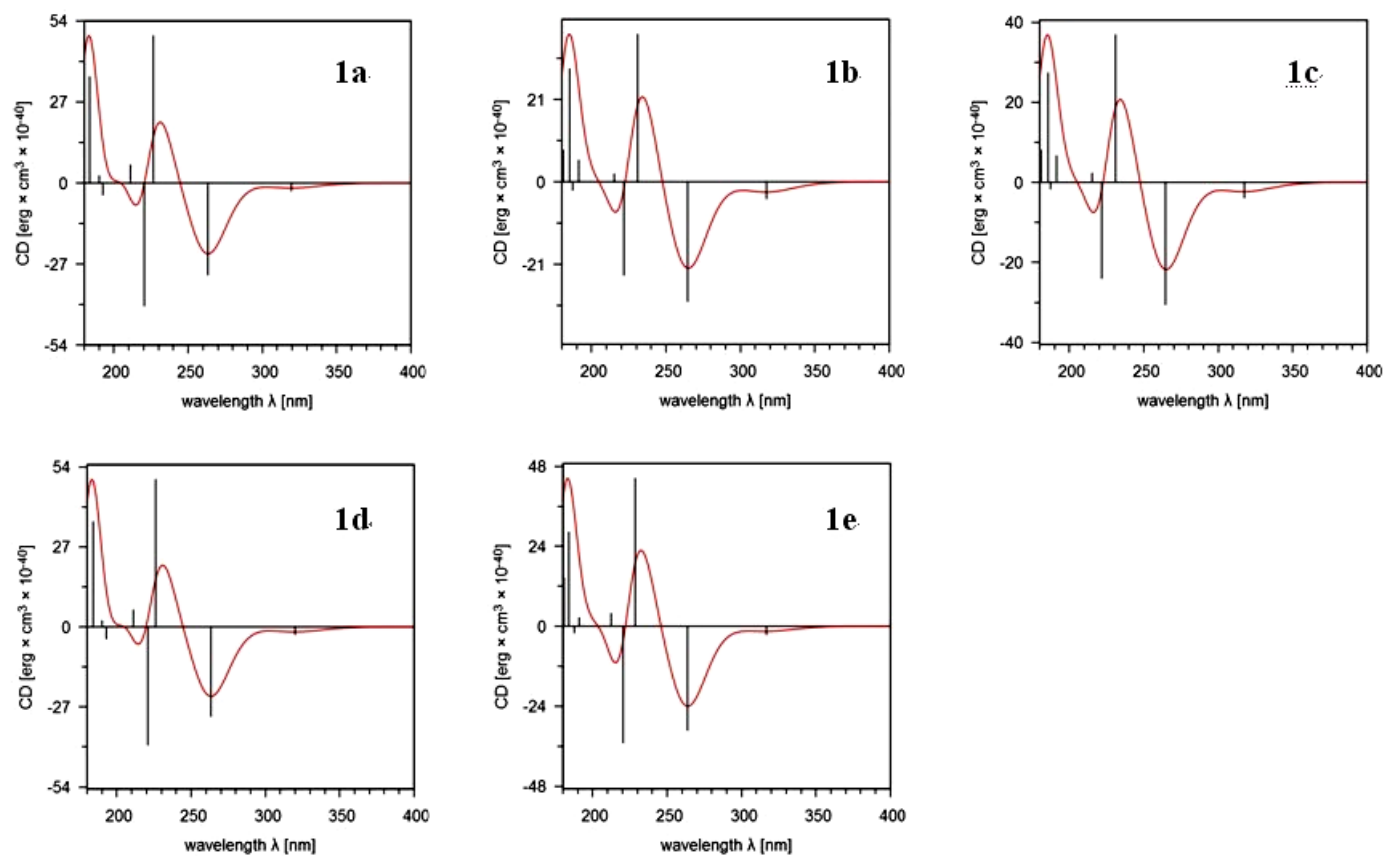

**Figure S15.** Calculated ECD Spectrum for the low-energy conformers of **2**. Vertical bars represent rotational strengths  $R$ .  $\sigma = 0.30$  eV, shift =  $\pm 0$  nm.

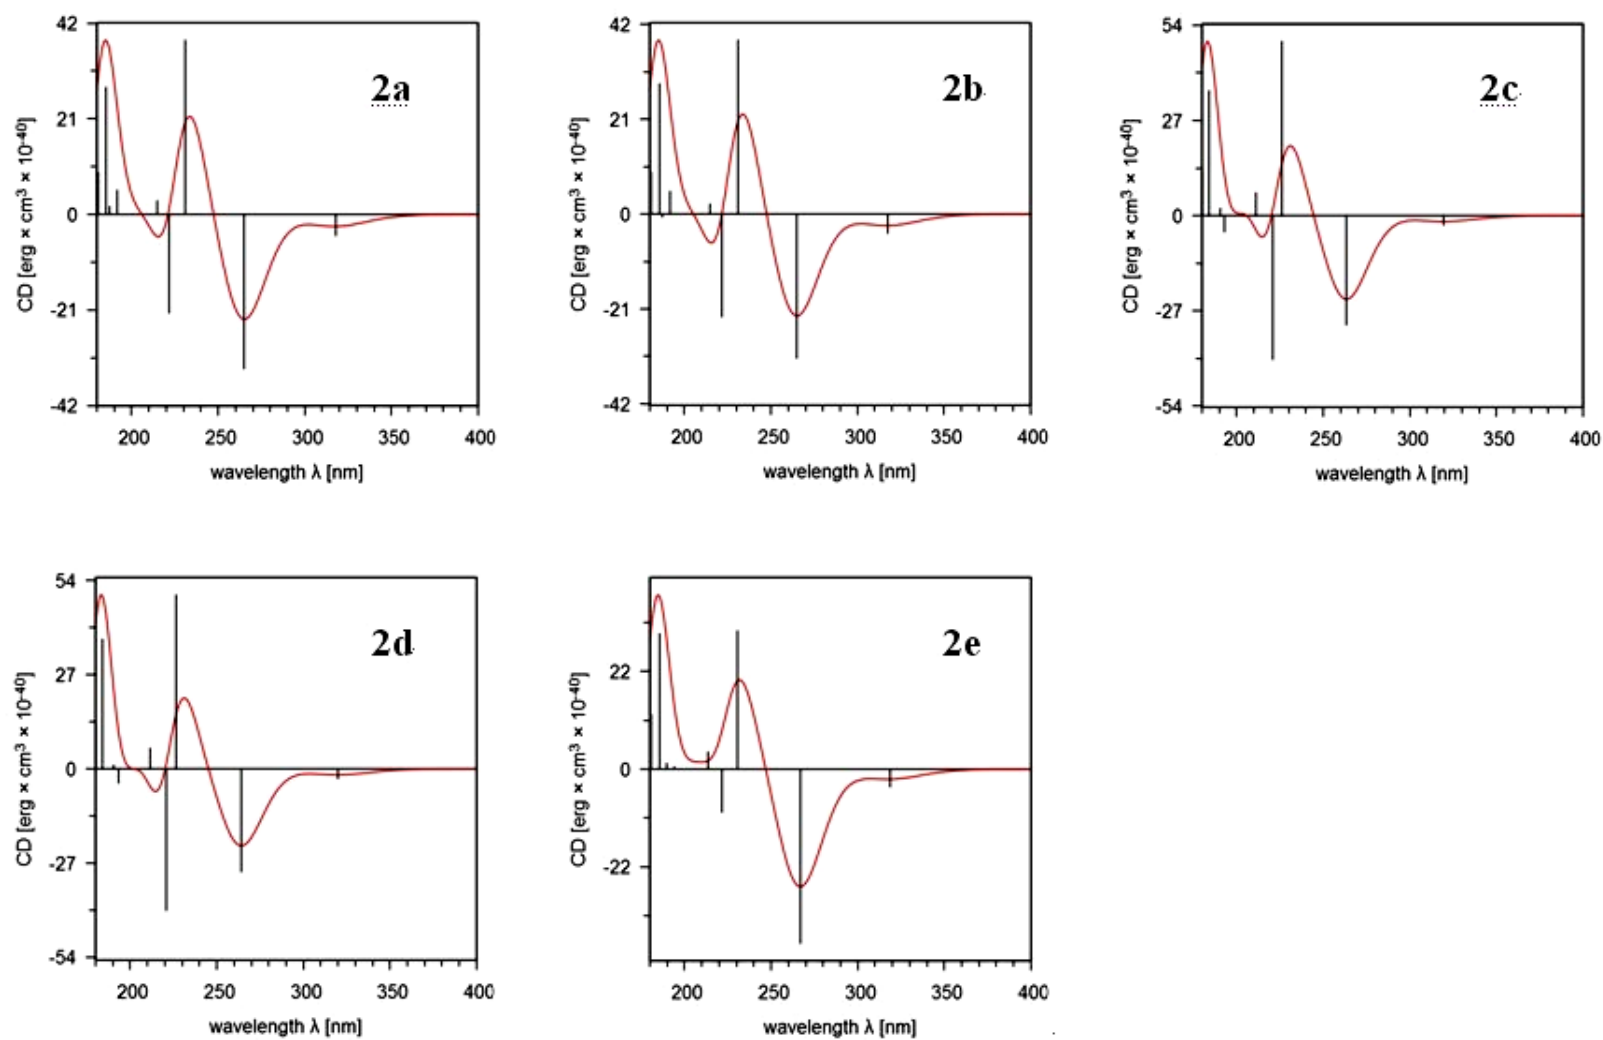



**Figure S16.**  $^1\text{H}$  NMR Spectrum (500 MHz) of compound **3** in  $\text{CDCl}_3$ .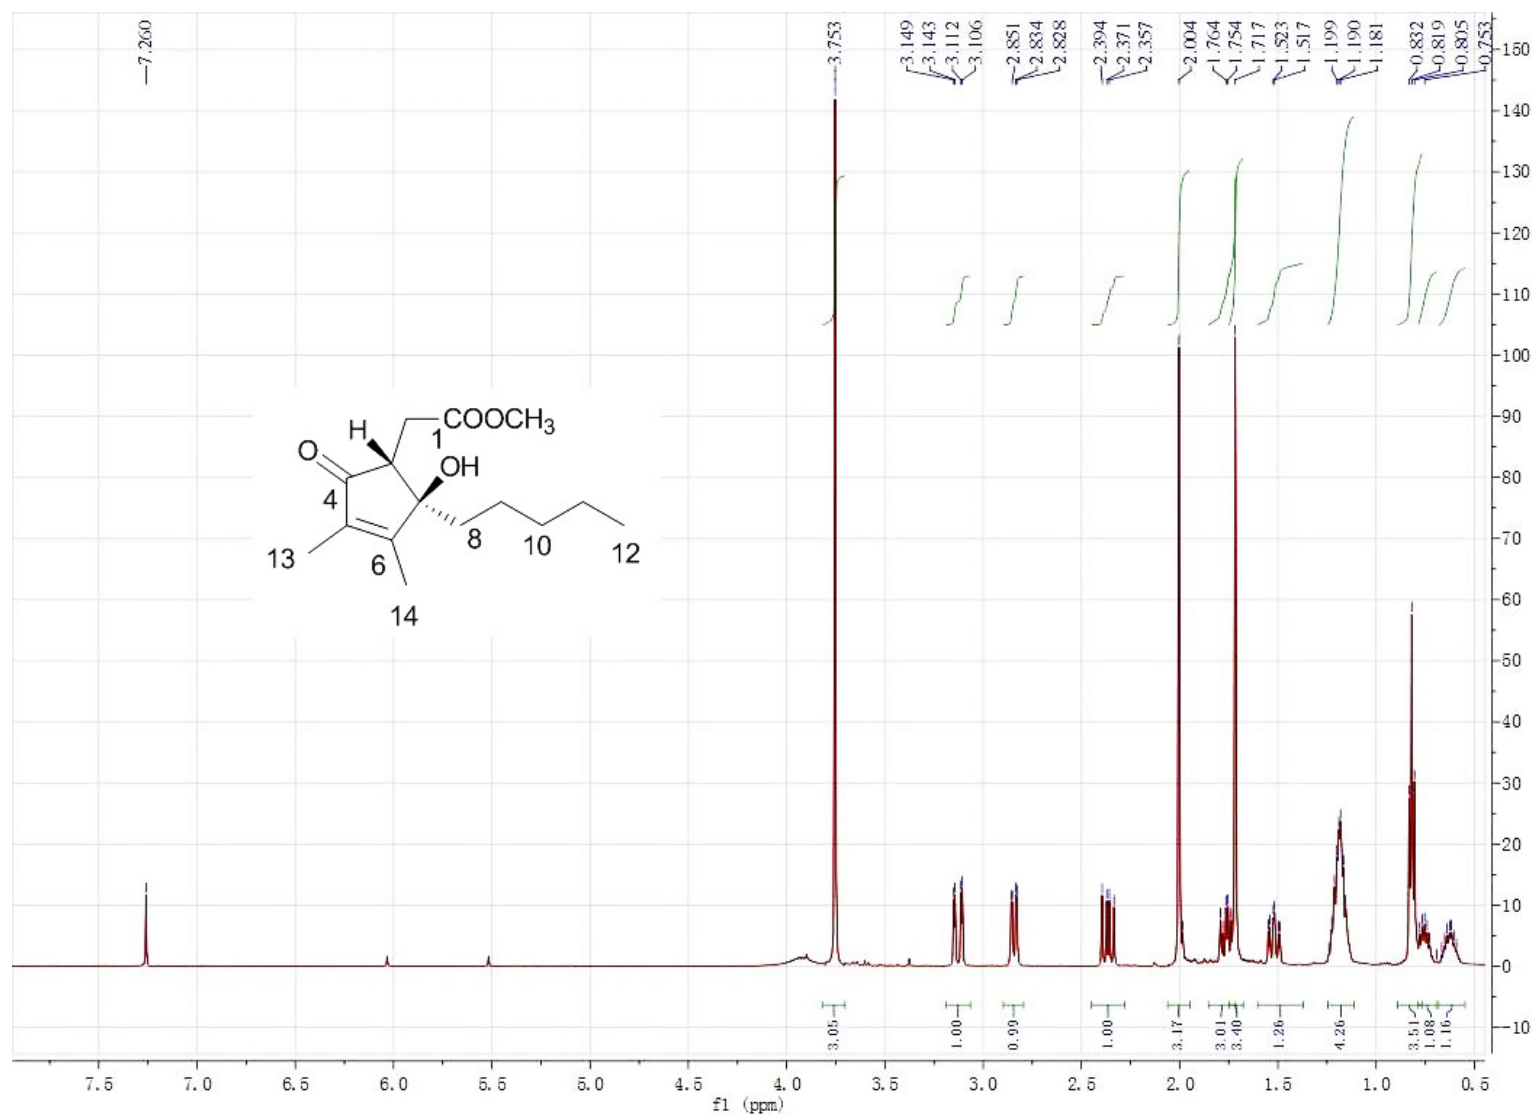

**Figure S17.**  $^{13}\text{C}$  NMR Spectrum (125 MHz) of compound **3** in  $\text{CDCl}_3$ .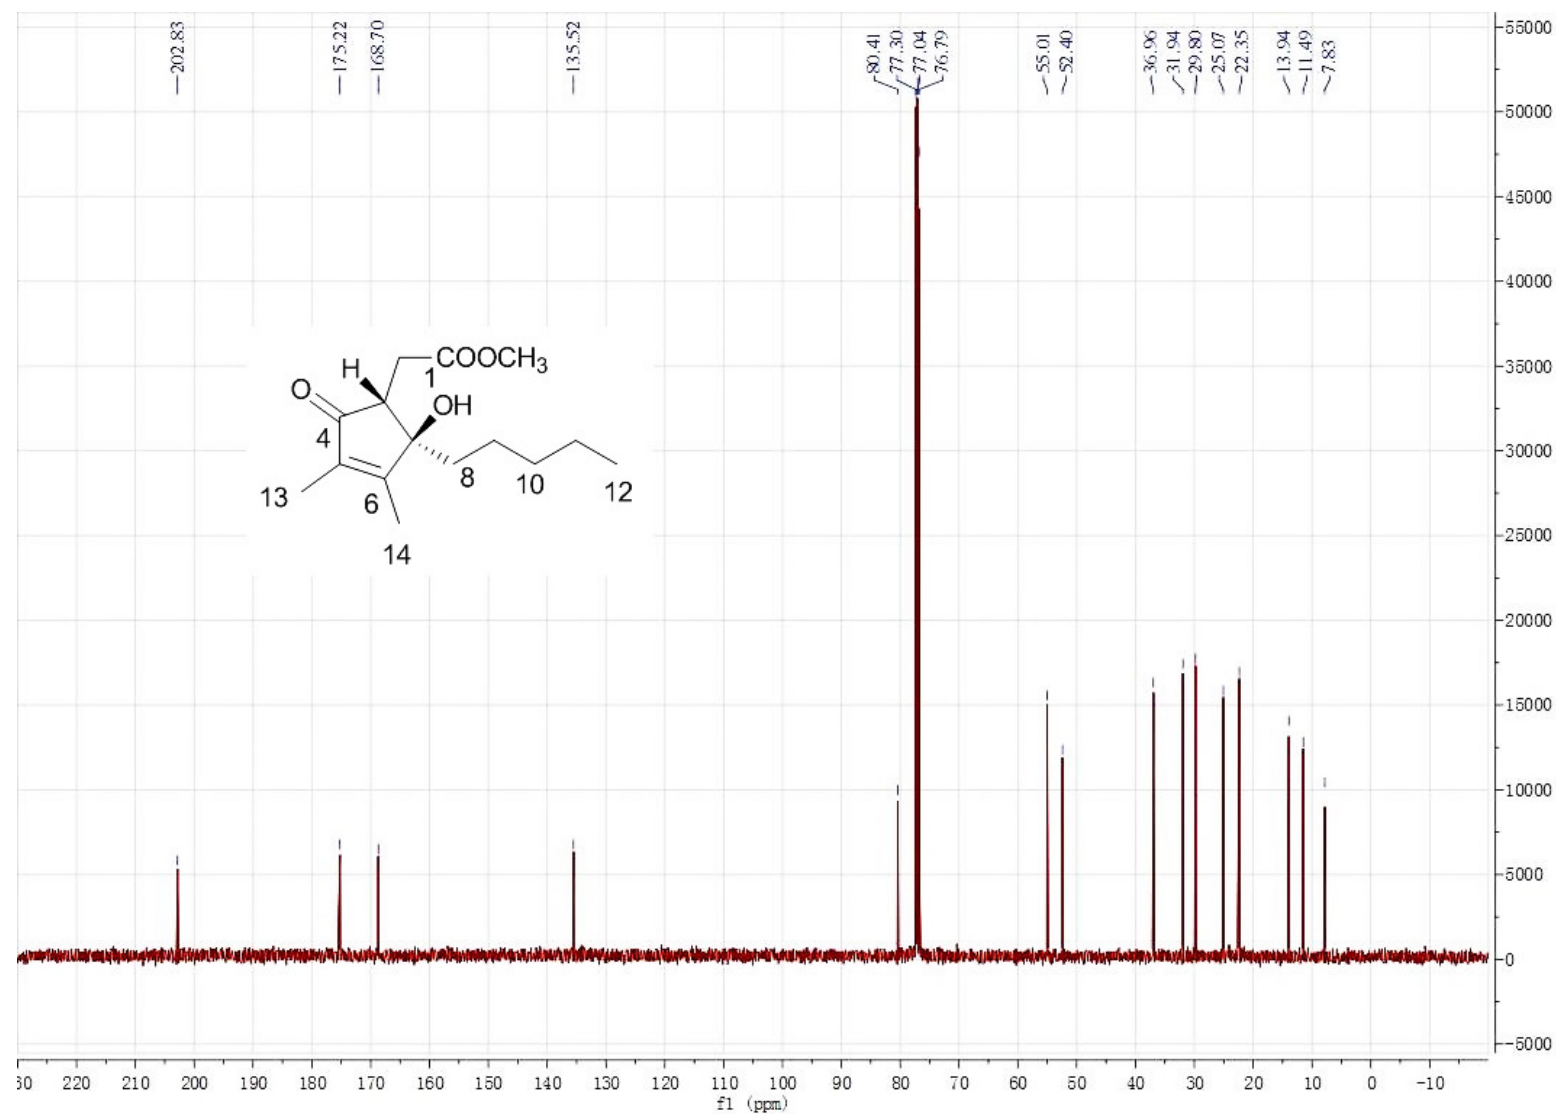

**Figure S18.** HSQC Spectrum of compound **3** in CDCl<sub>3</sub>.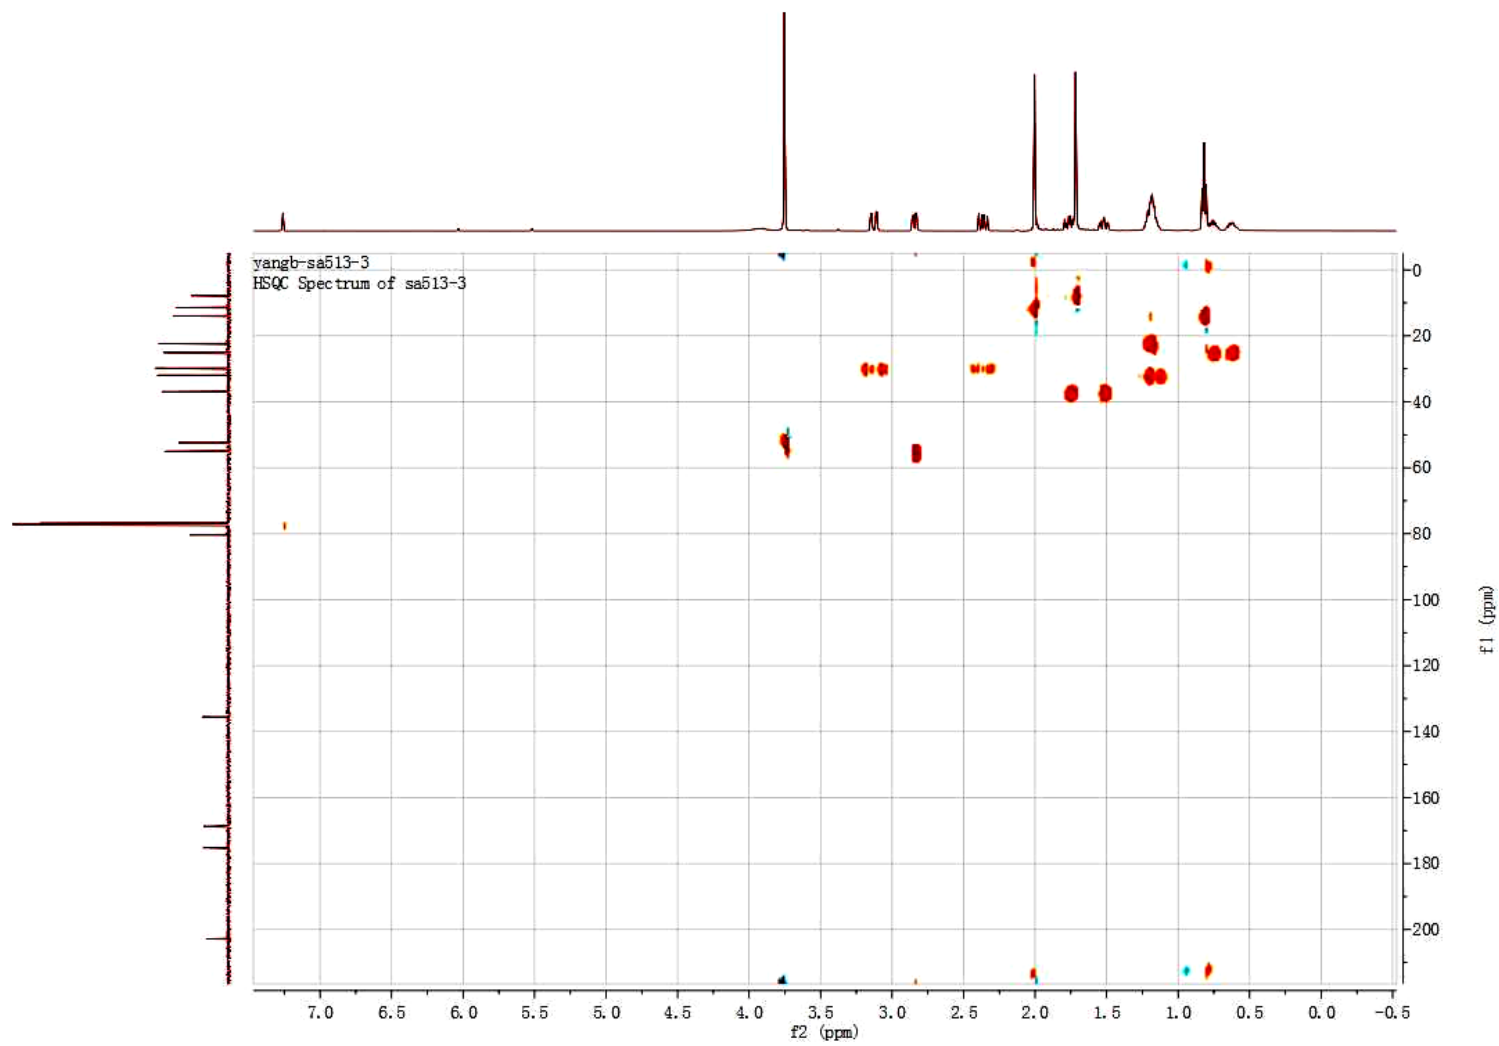

**Figure S19.** HMBC Spectrum of compound **3** in CDCl<sub>3</sub>.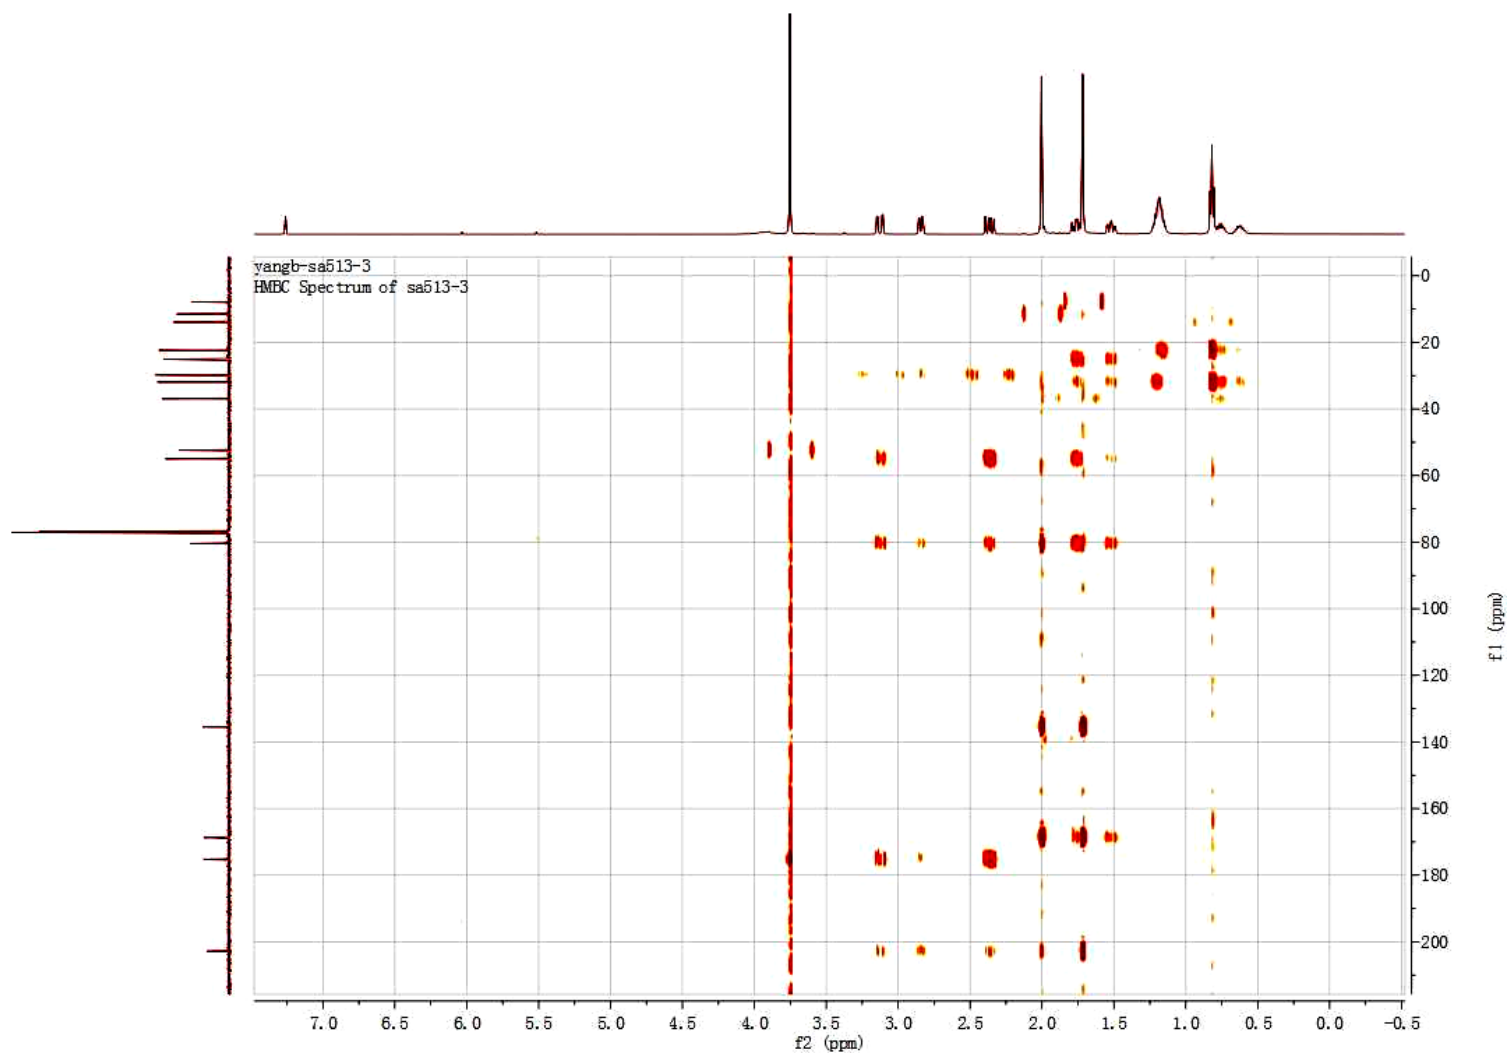

Figure S20. ESIMS spectrum of compound 3.

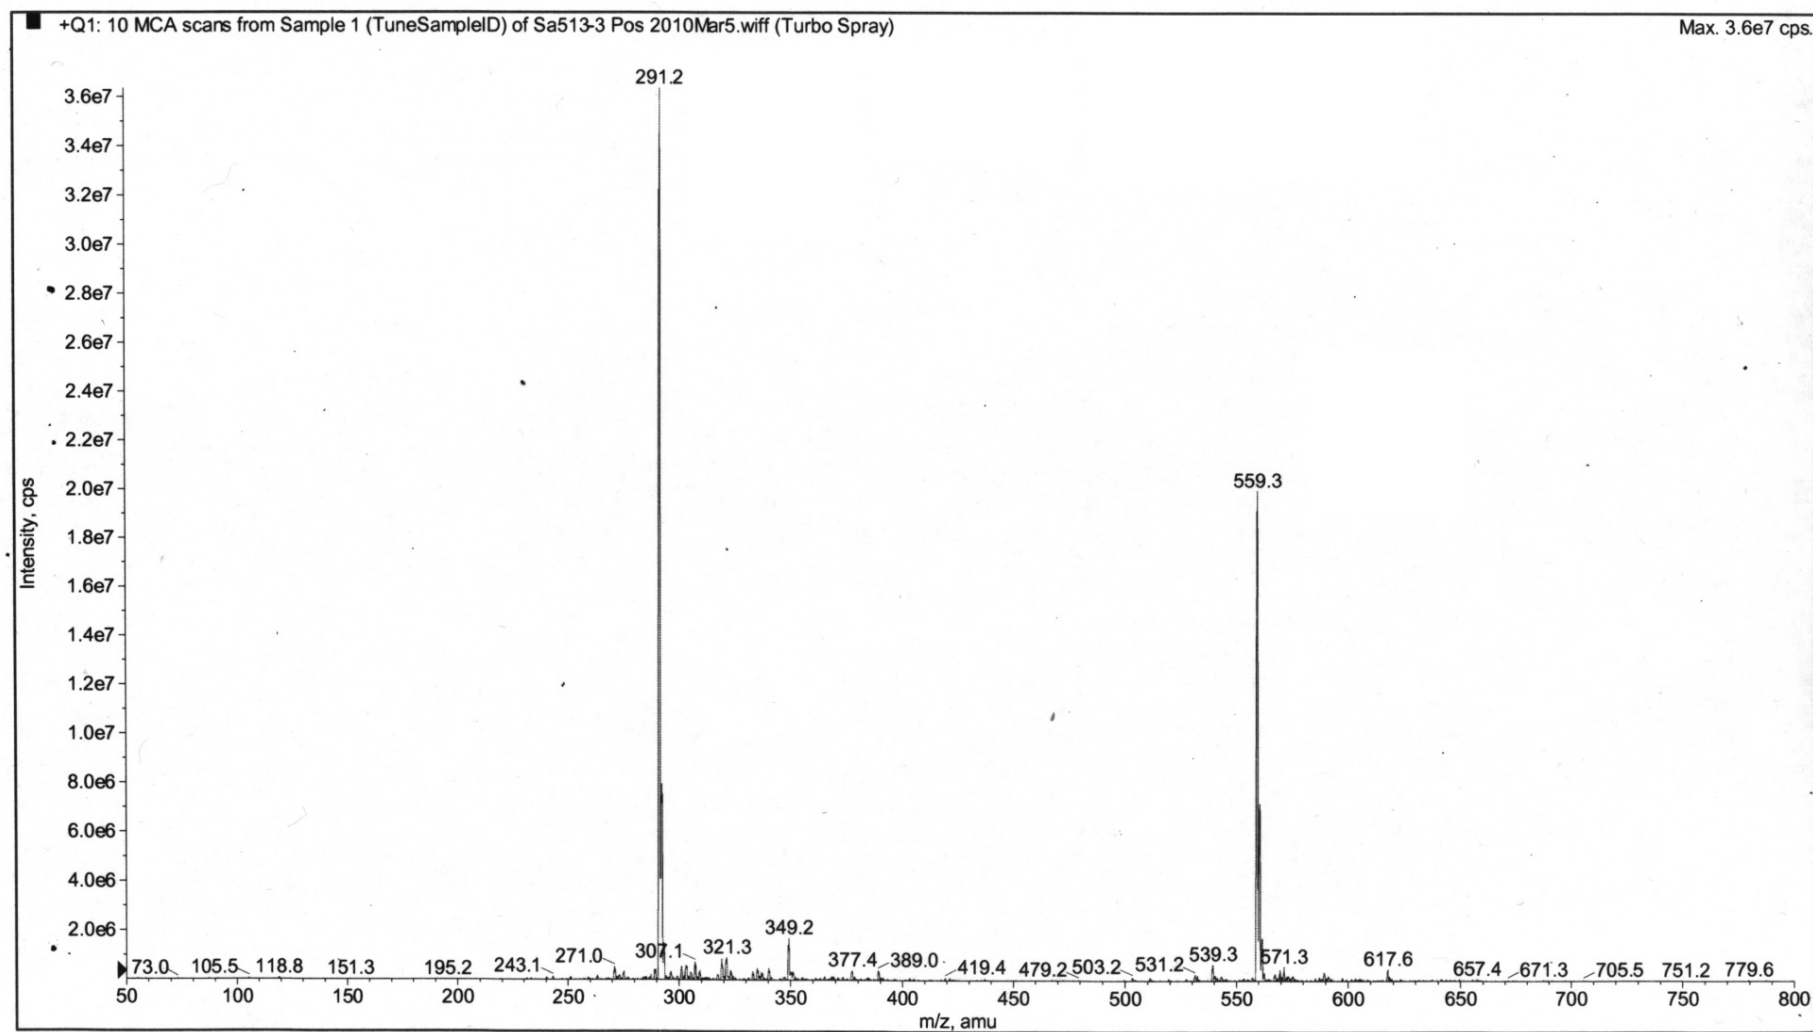

**Figure S21.**  $^1\text{H}$  NMR Spectrum (500 MHz) of compound **4** in  $\text{CDCl}_3$ .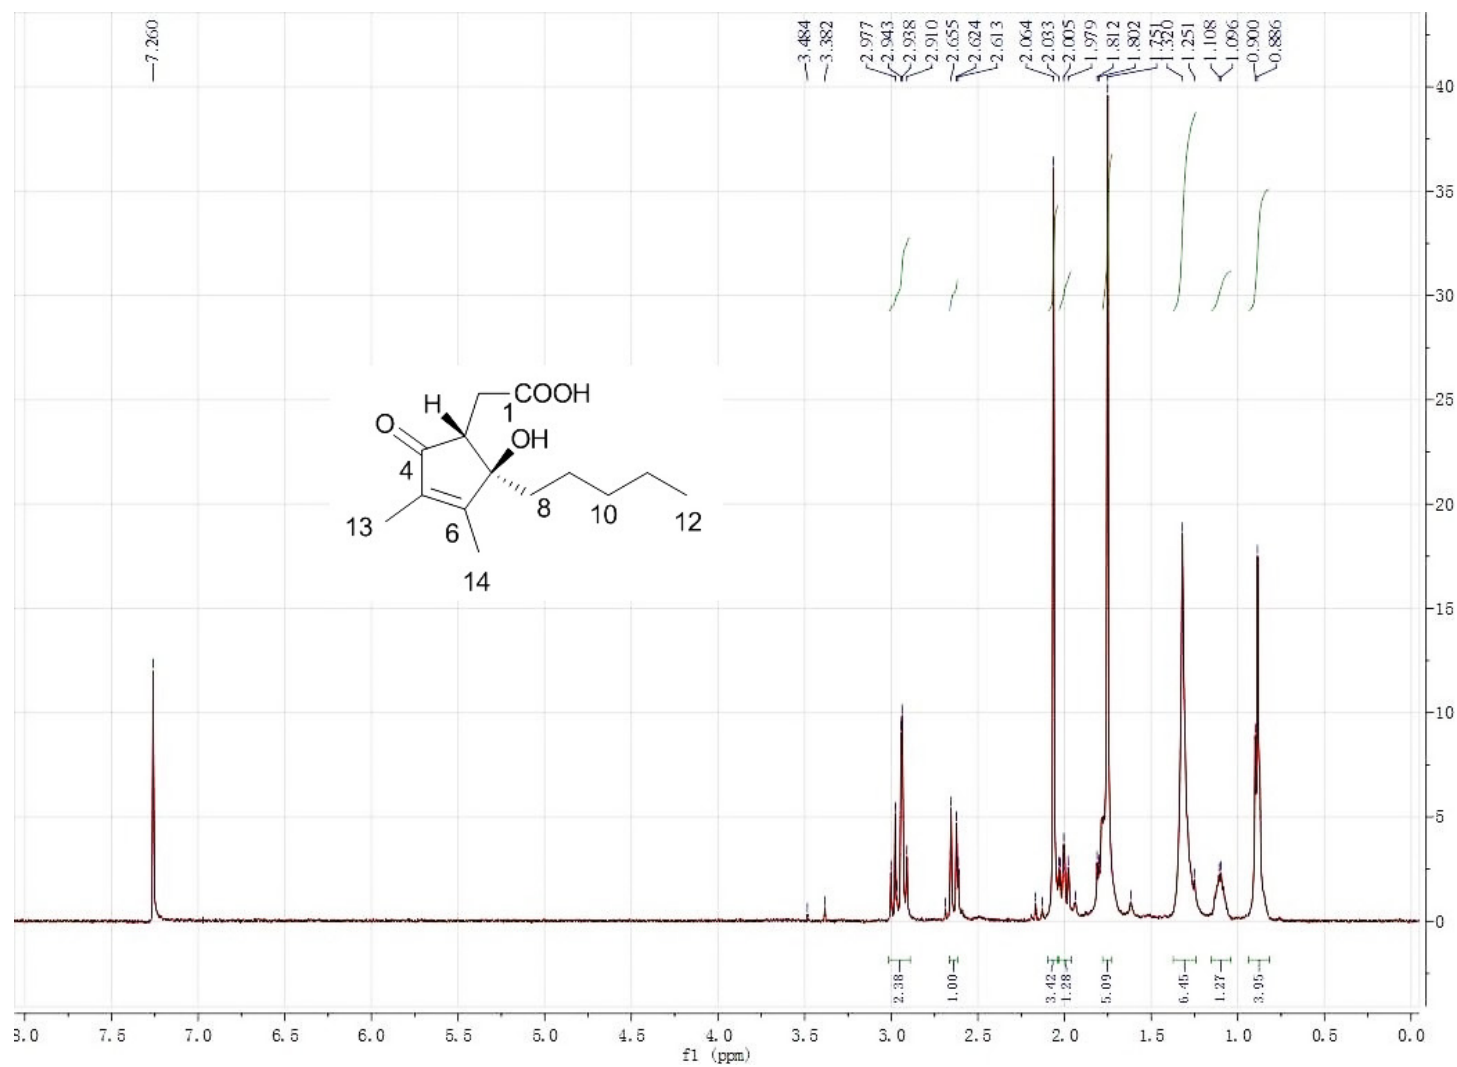

**Figure S22.**  $^{13}\text{C}$  NMR Spectrum (125 MHz) of compound **4** in  $\text{CDCl}_3$ .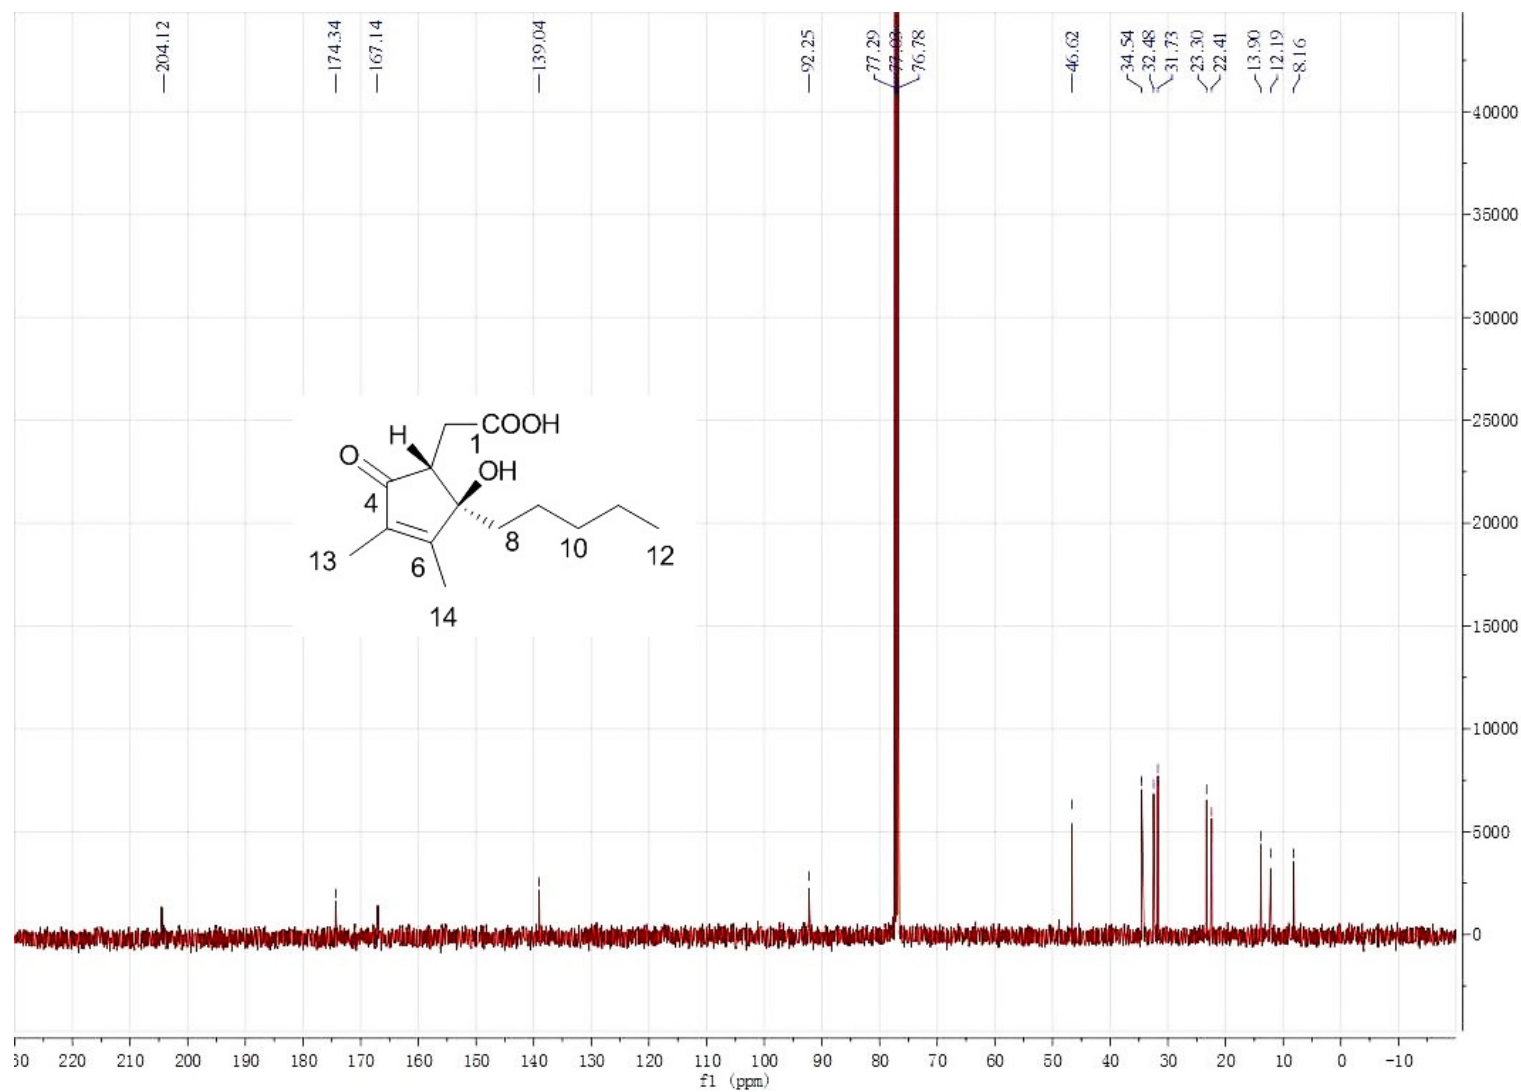

Figure S23. ESIMS spectrum of compound 4.

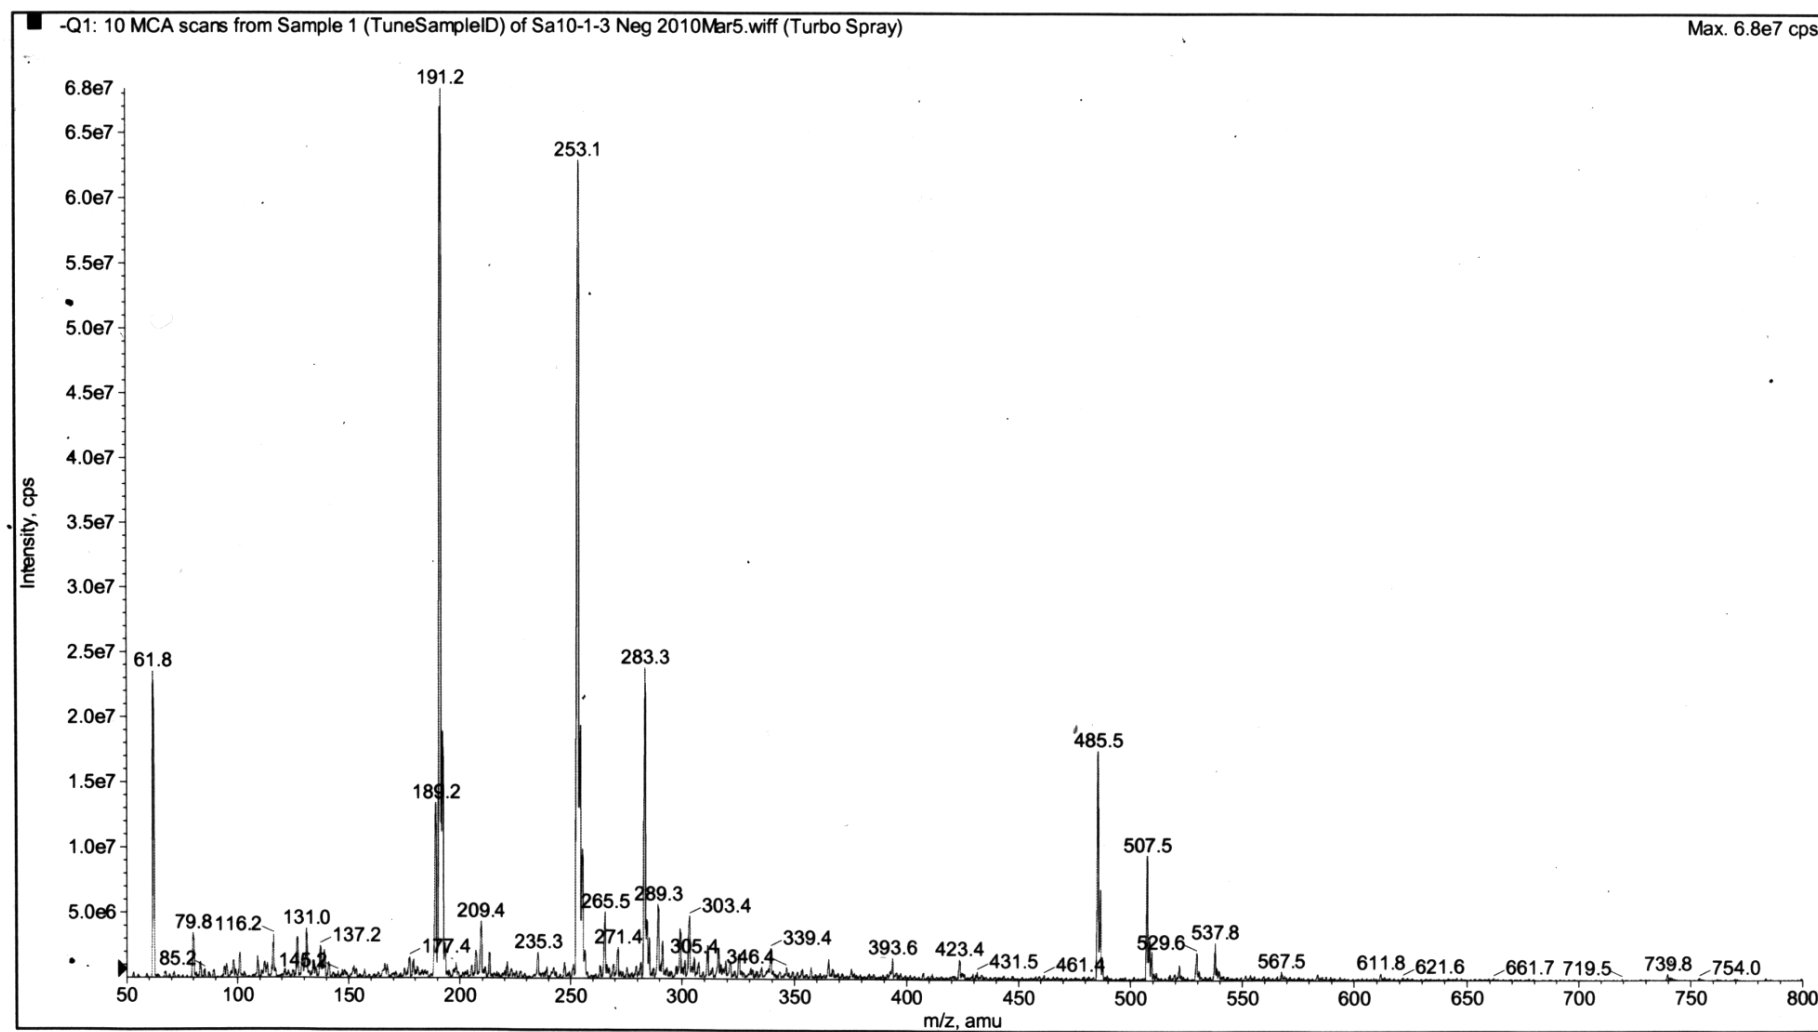



**Figure S24.**  $^1\text{H}$  NMR Spectrum (500 MHz) of compound **5** in  $\text{CDCl}_3$ .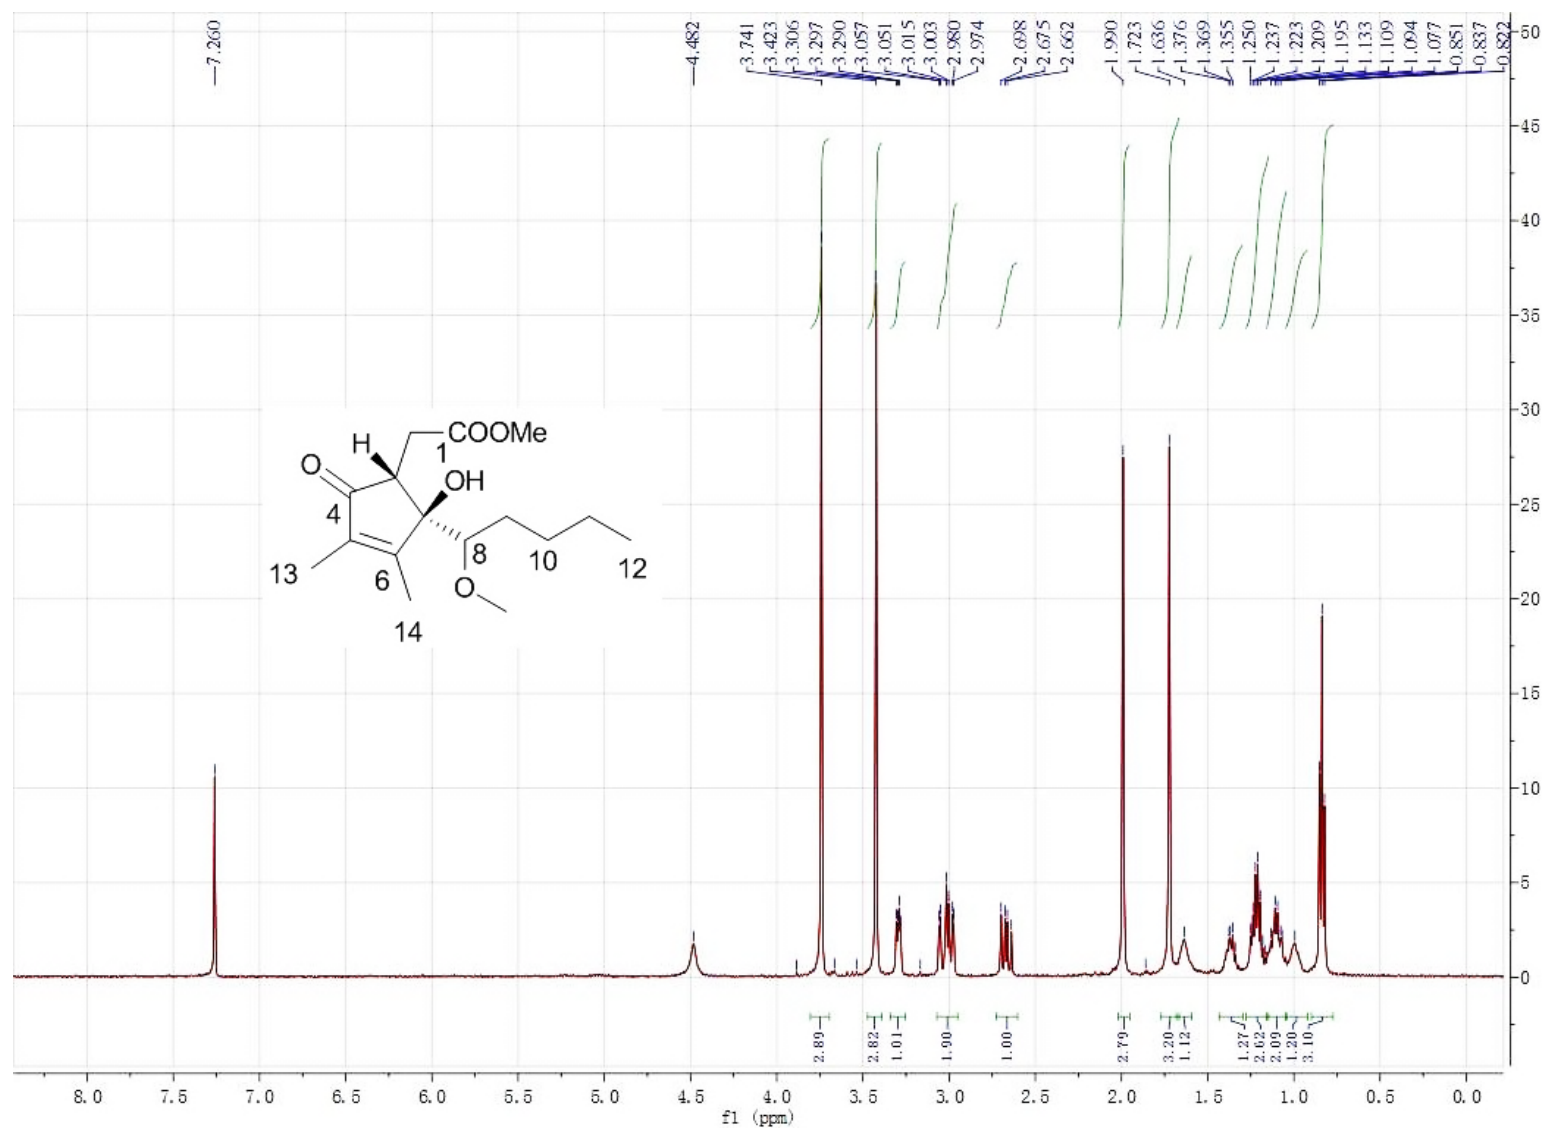

**Figure S25.**  $^{13}\text{C}$  NMR Spectrum (125 MHz) of compound **5** in  $\text{CDCl}_3$ .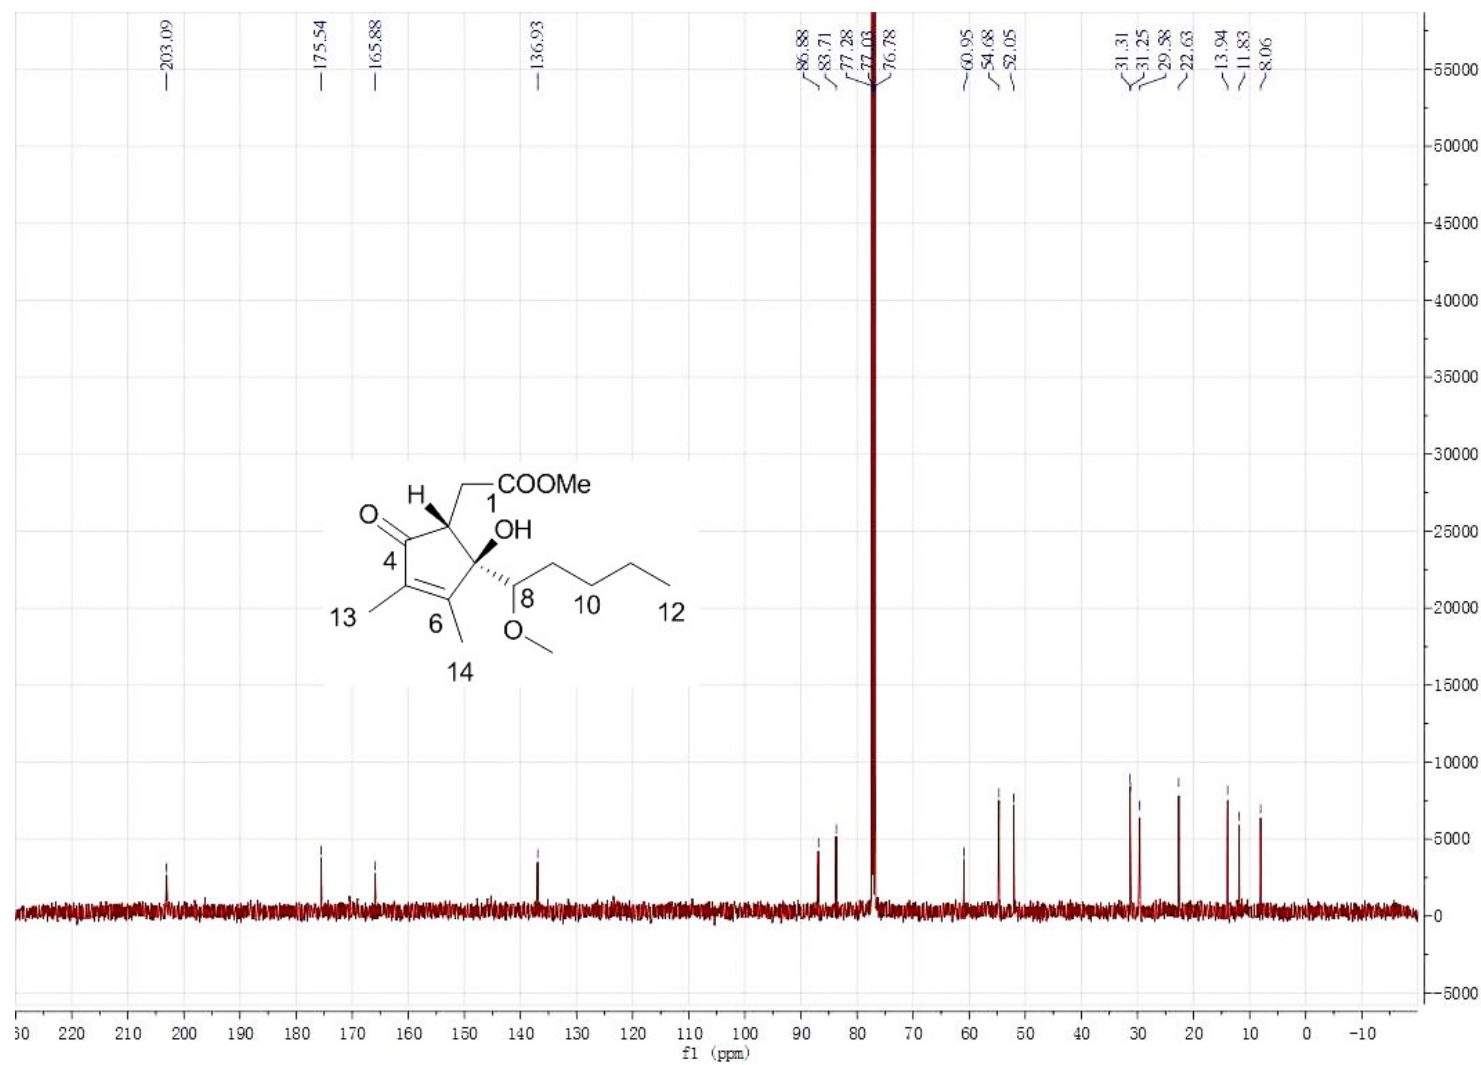

**Figure S26.** HSQC Spectrum of compound **5** in CDCl<sub>3</sub>.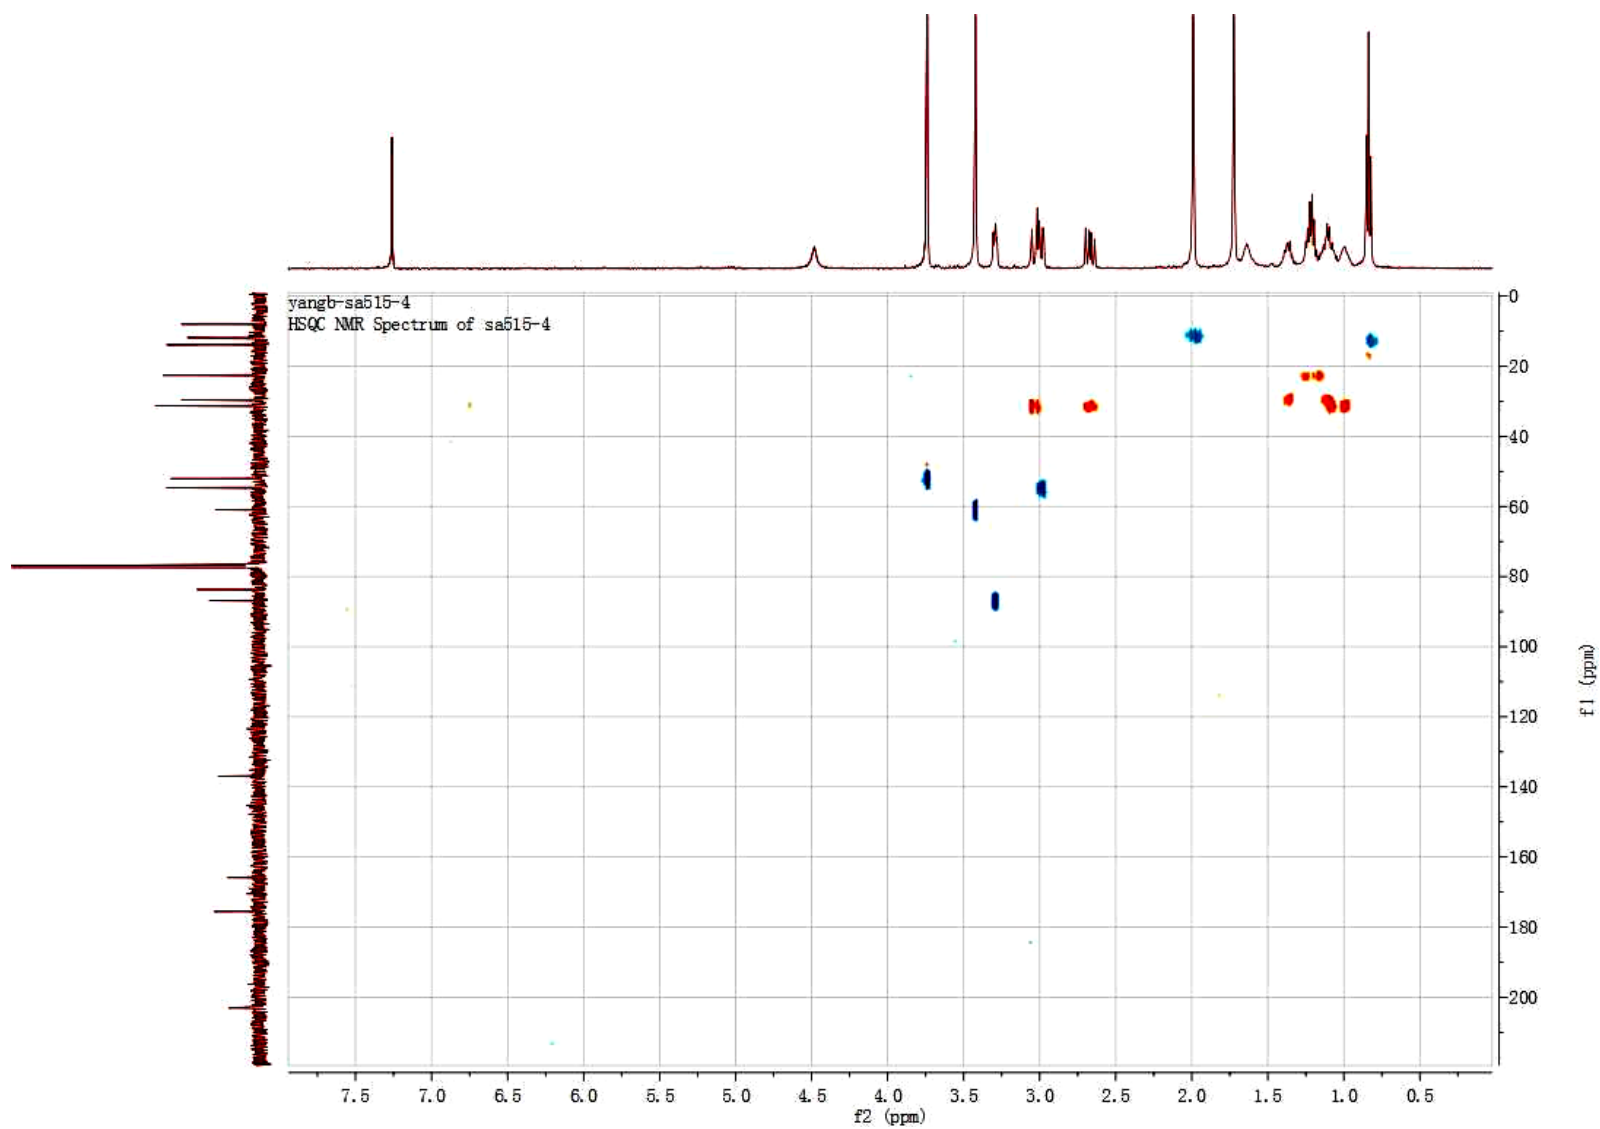

**Figure S27.** HMBC Spectrum of compound **5** in CDCl<sub>3</sub>.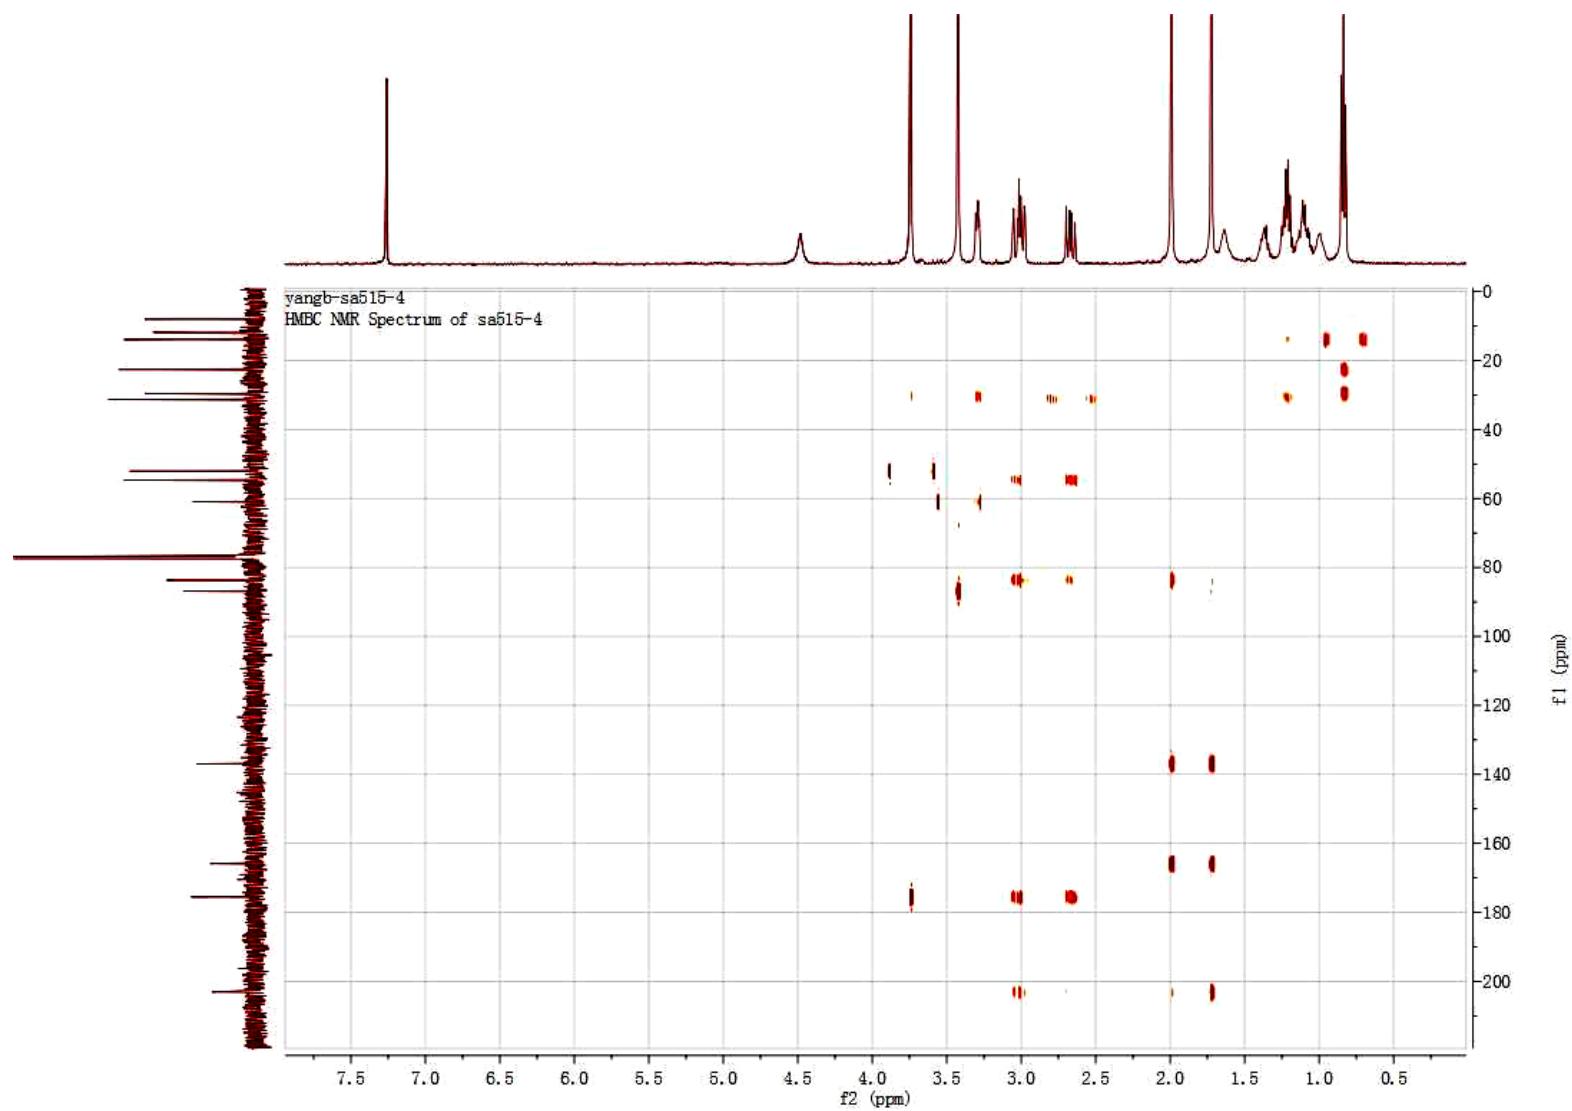

Figure S28. ESIMS spectrum of compound 5.

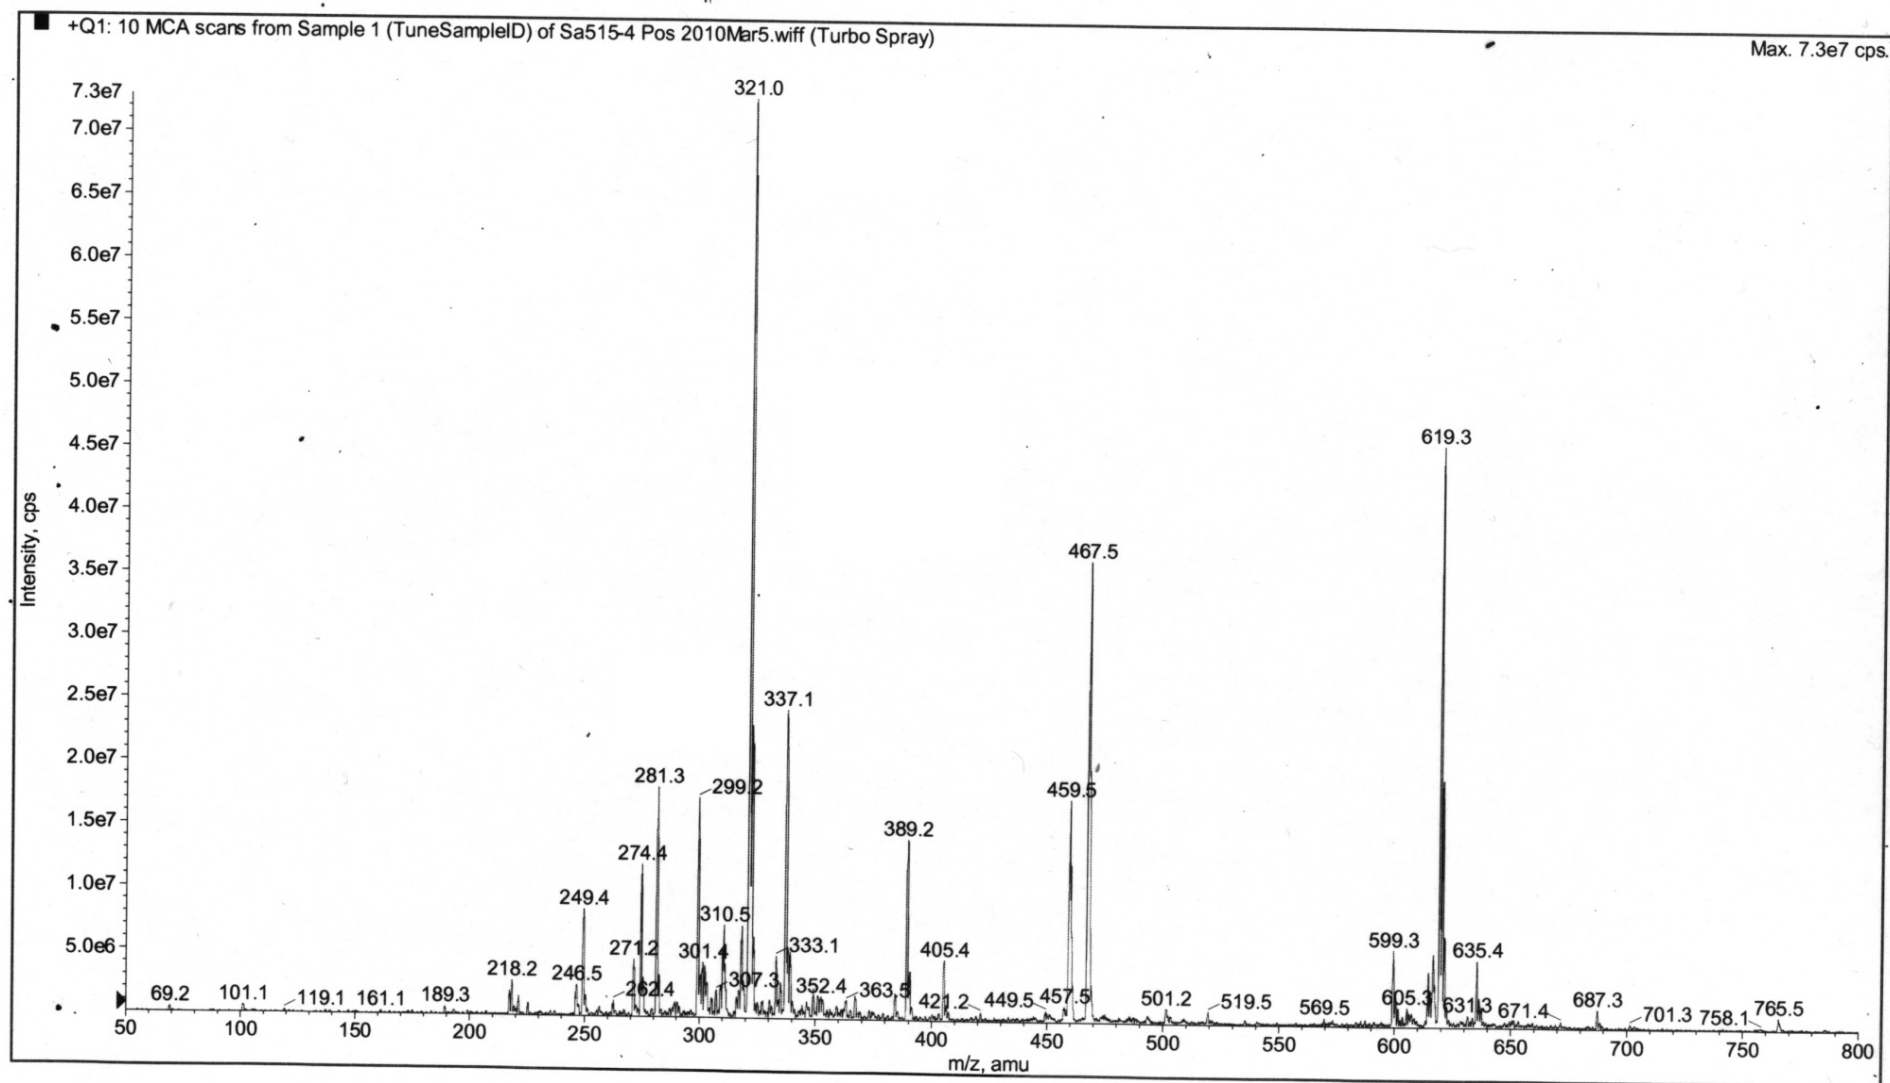

**Figure S29.**  $^1\text{H}$  NMR Spectrum (500 MHz) of compound **6** in  $\text{CDCl}_3$ .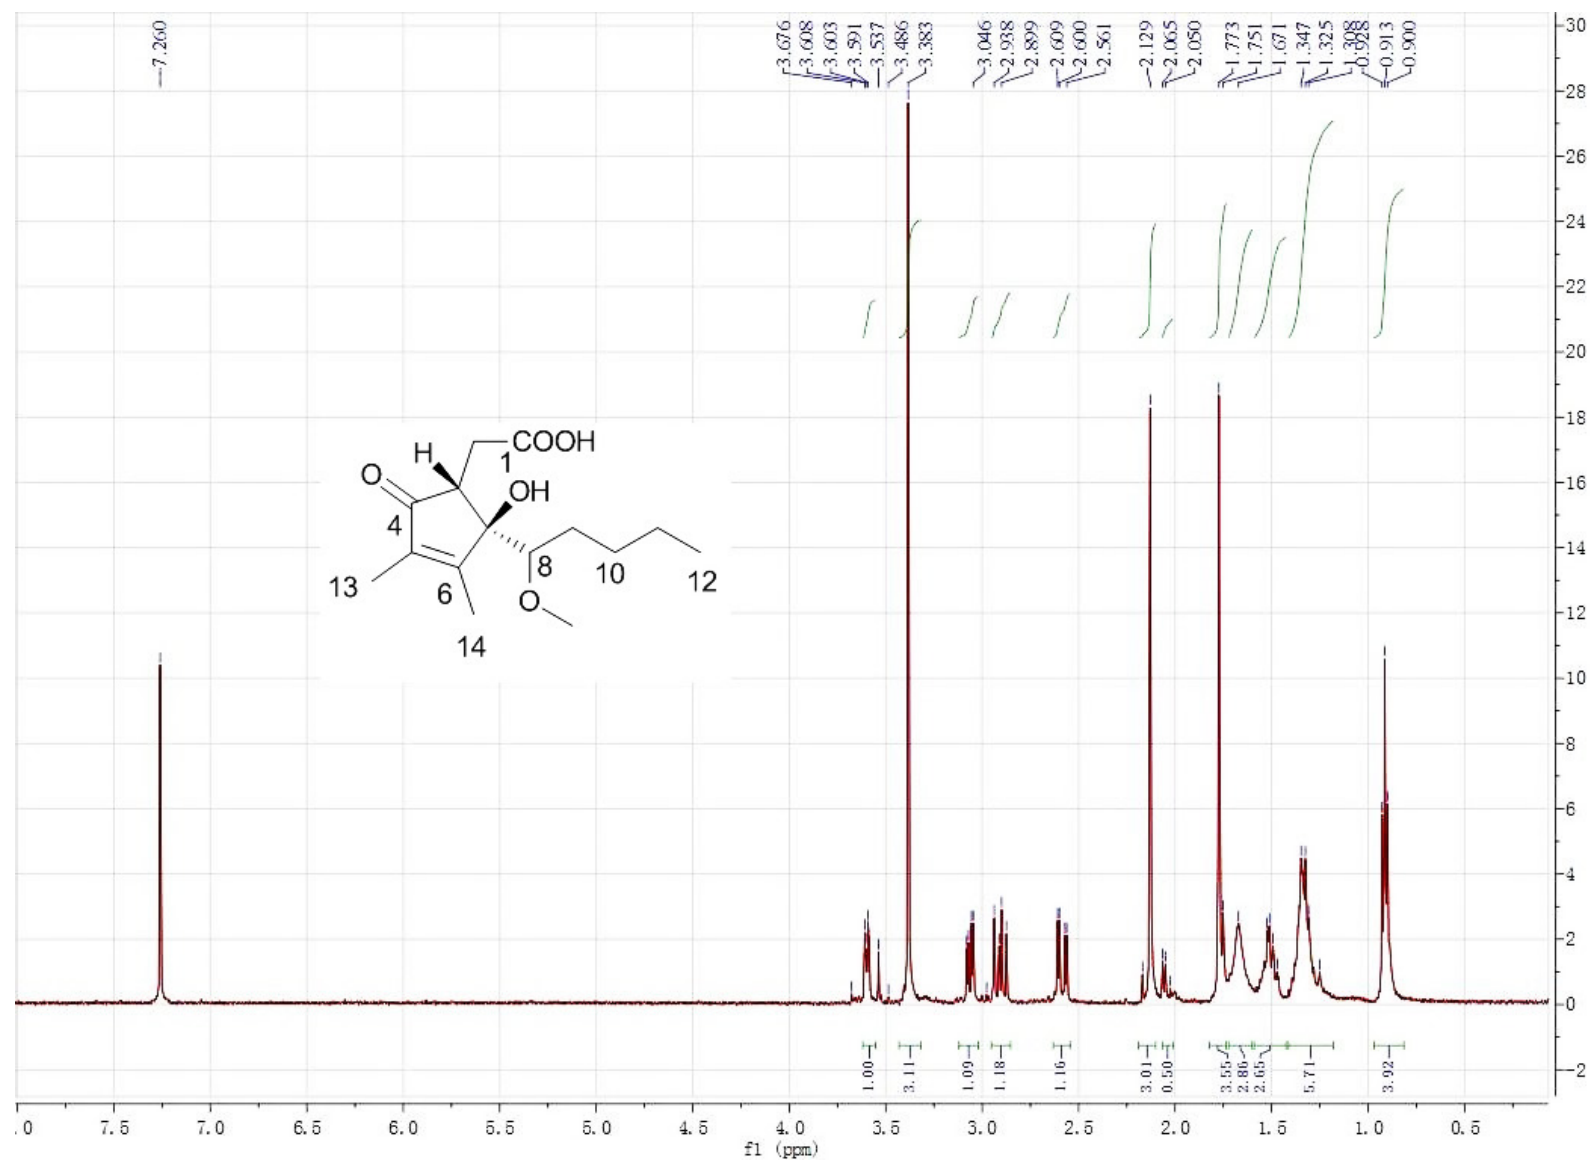

**Figure S30.**  $^{13}\text{C}$  NMR Spectrum (125 MHz) of compound **6** in  $\text{CDCl}_3$ .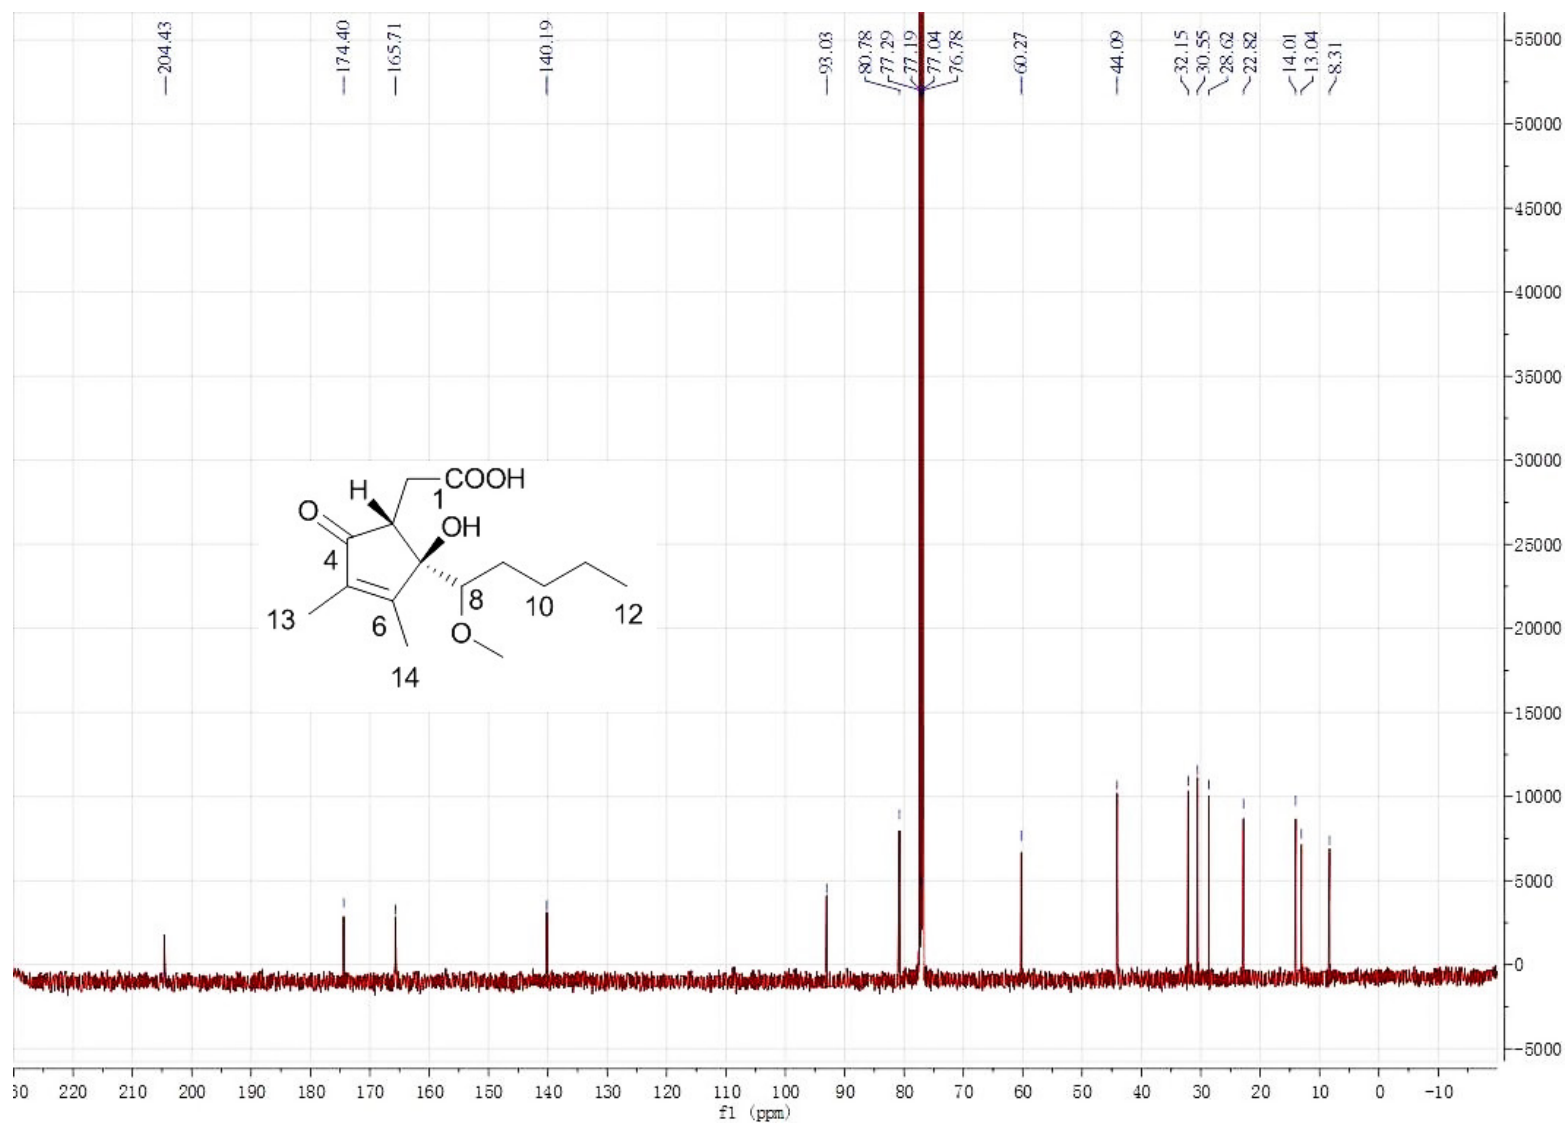

Figure S31. ESIMS spectrum of compound 6.

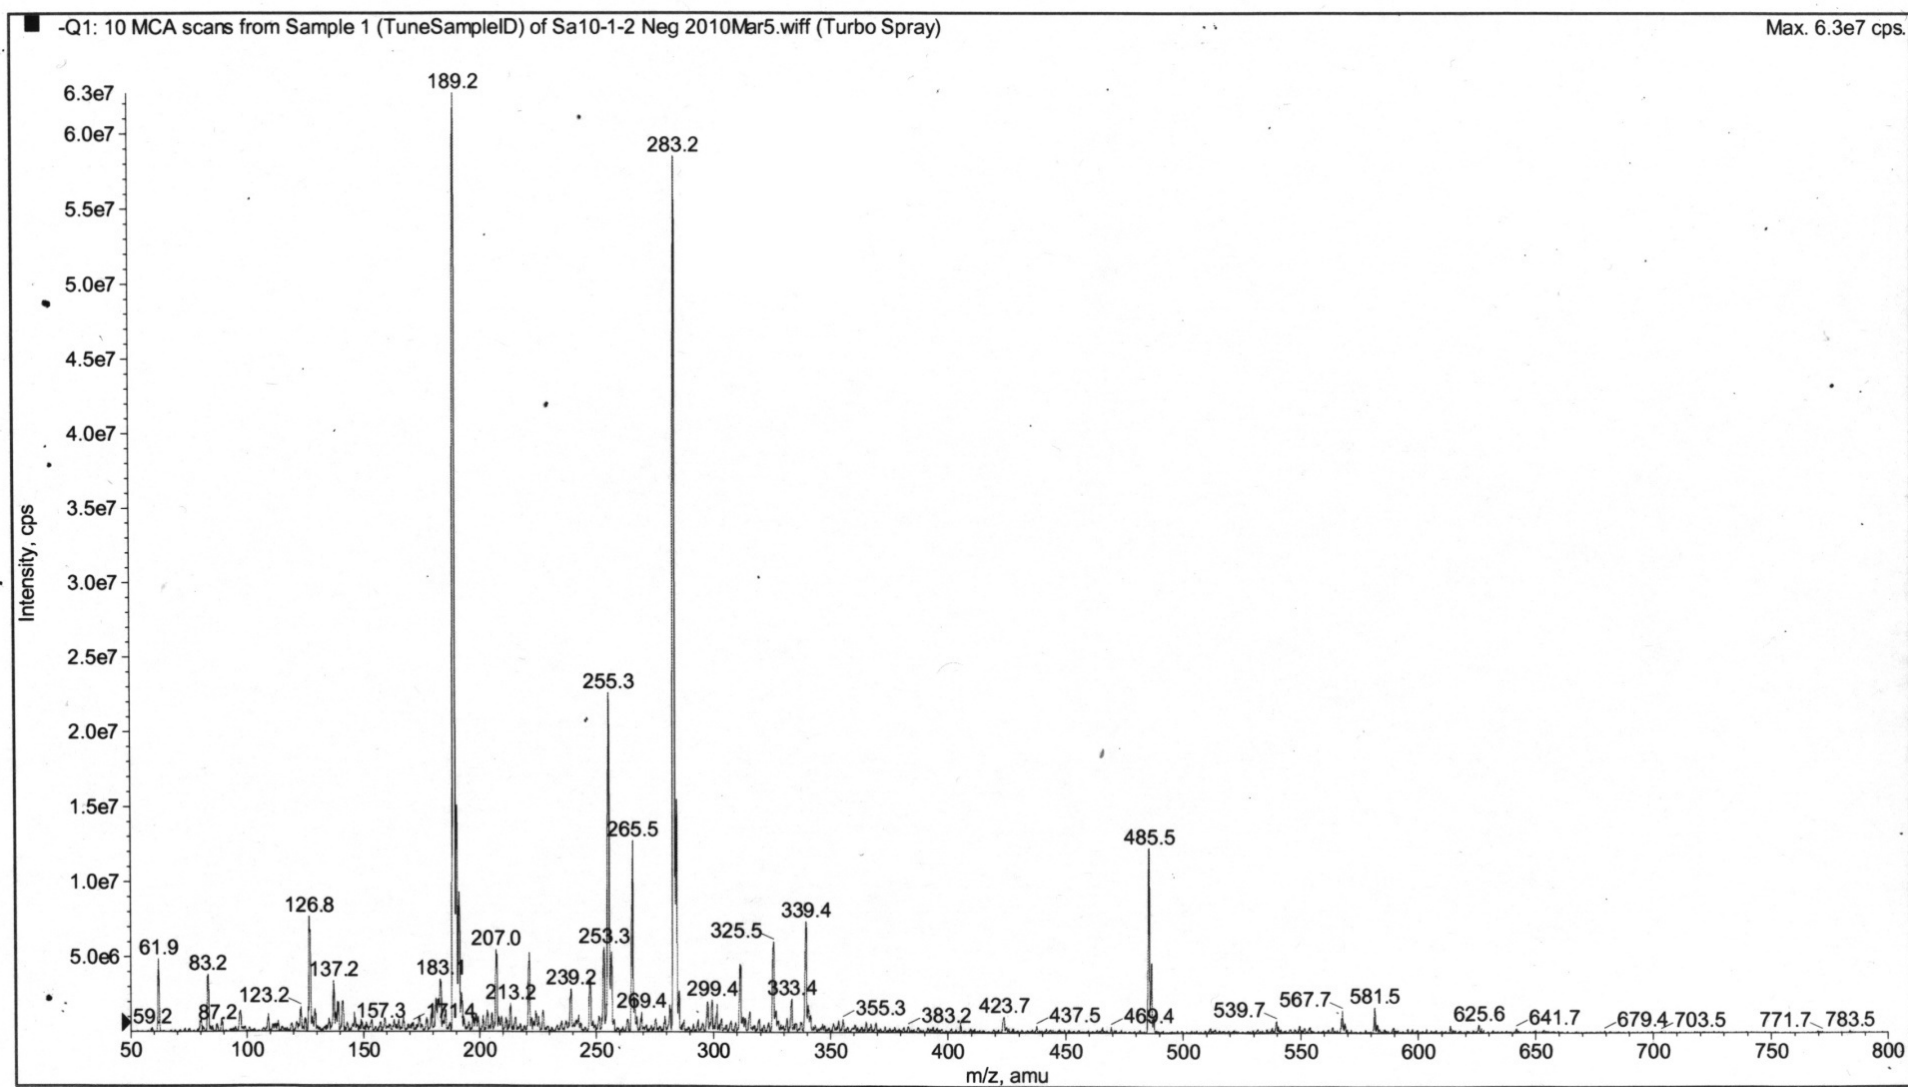



**Figure S32.**  $^1\text{H}$  NMR Spectrum (500 MHz) of compound **7** in  $\text{CDCl}_3$ .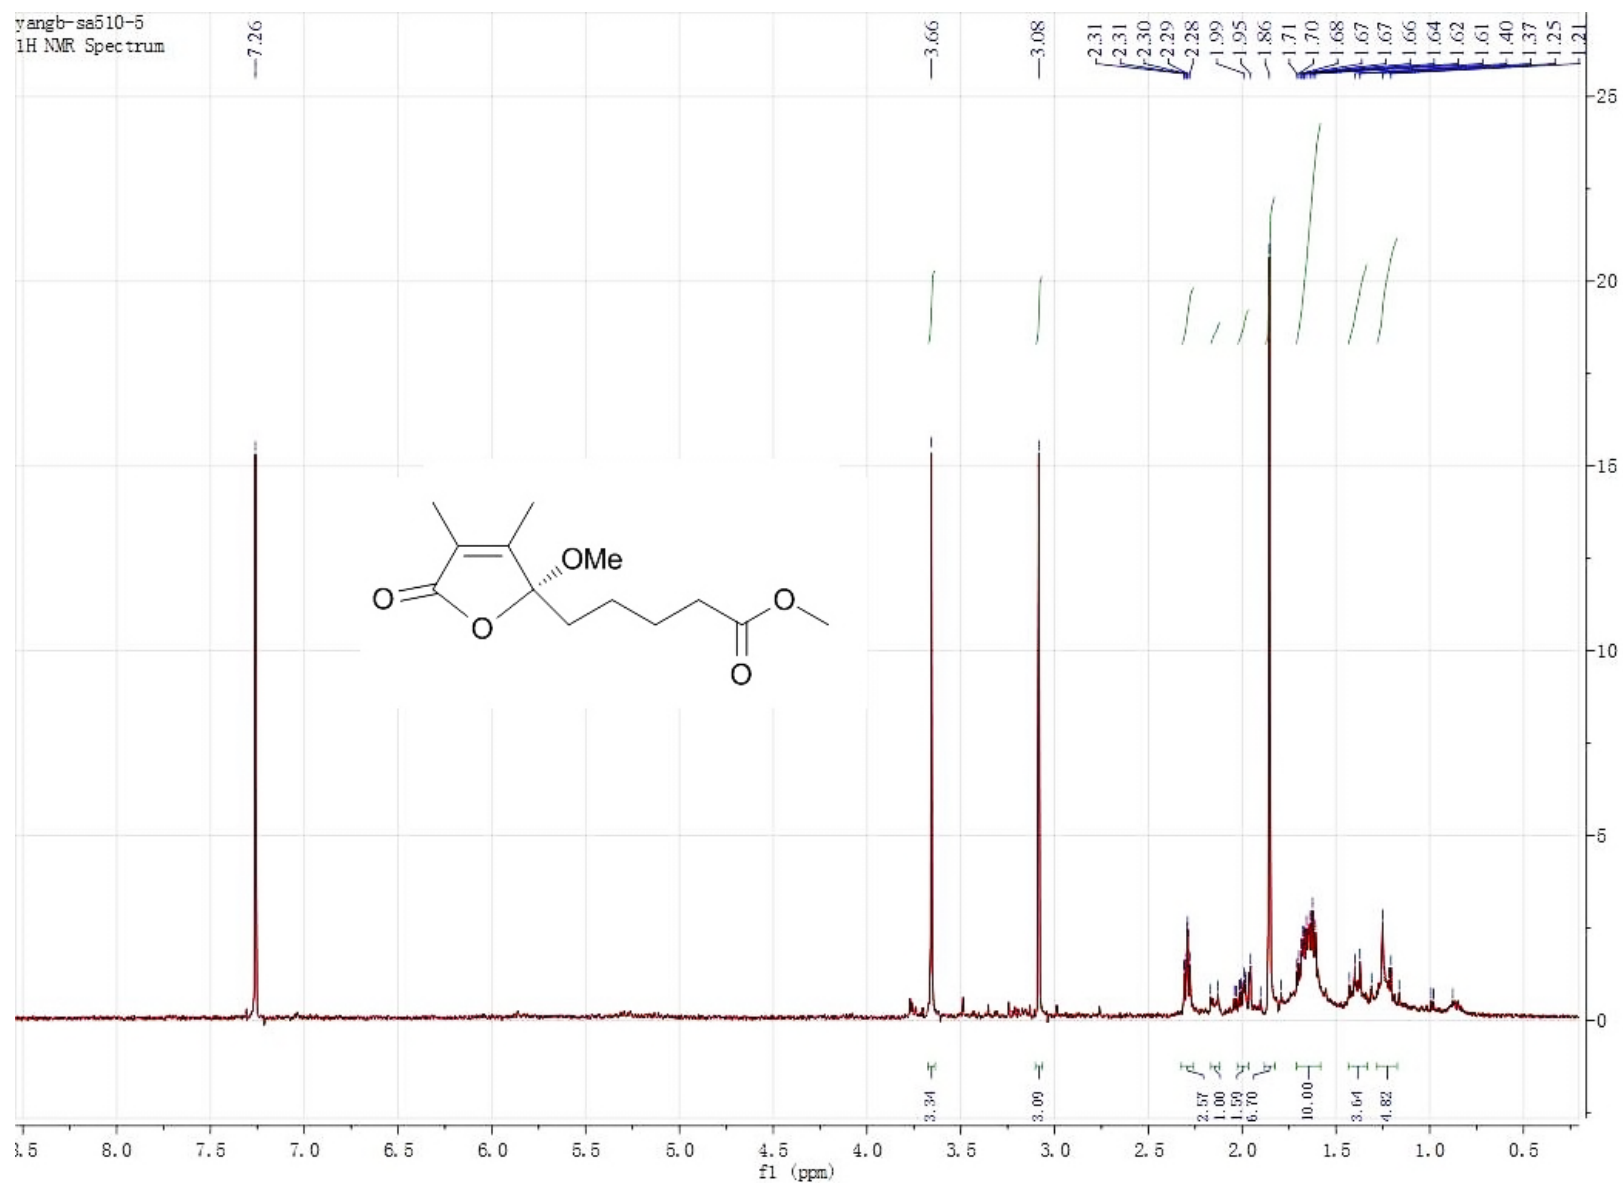

**Figure S33.**  $^{13}\text{C}$  NMR Spectrum (125 MHz) of compound7 in  $\text{CDCl}_3$ .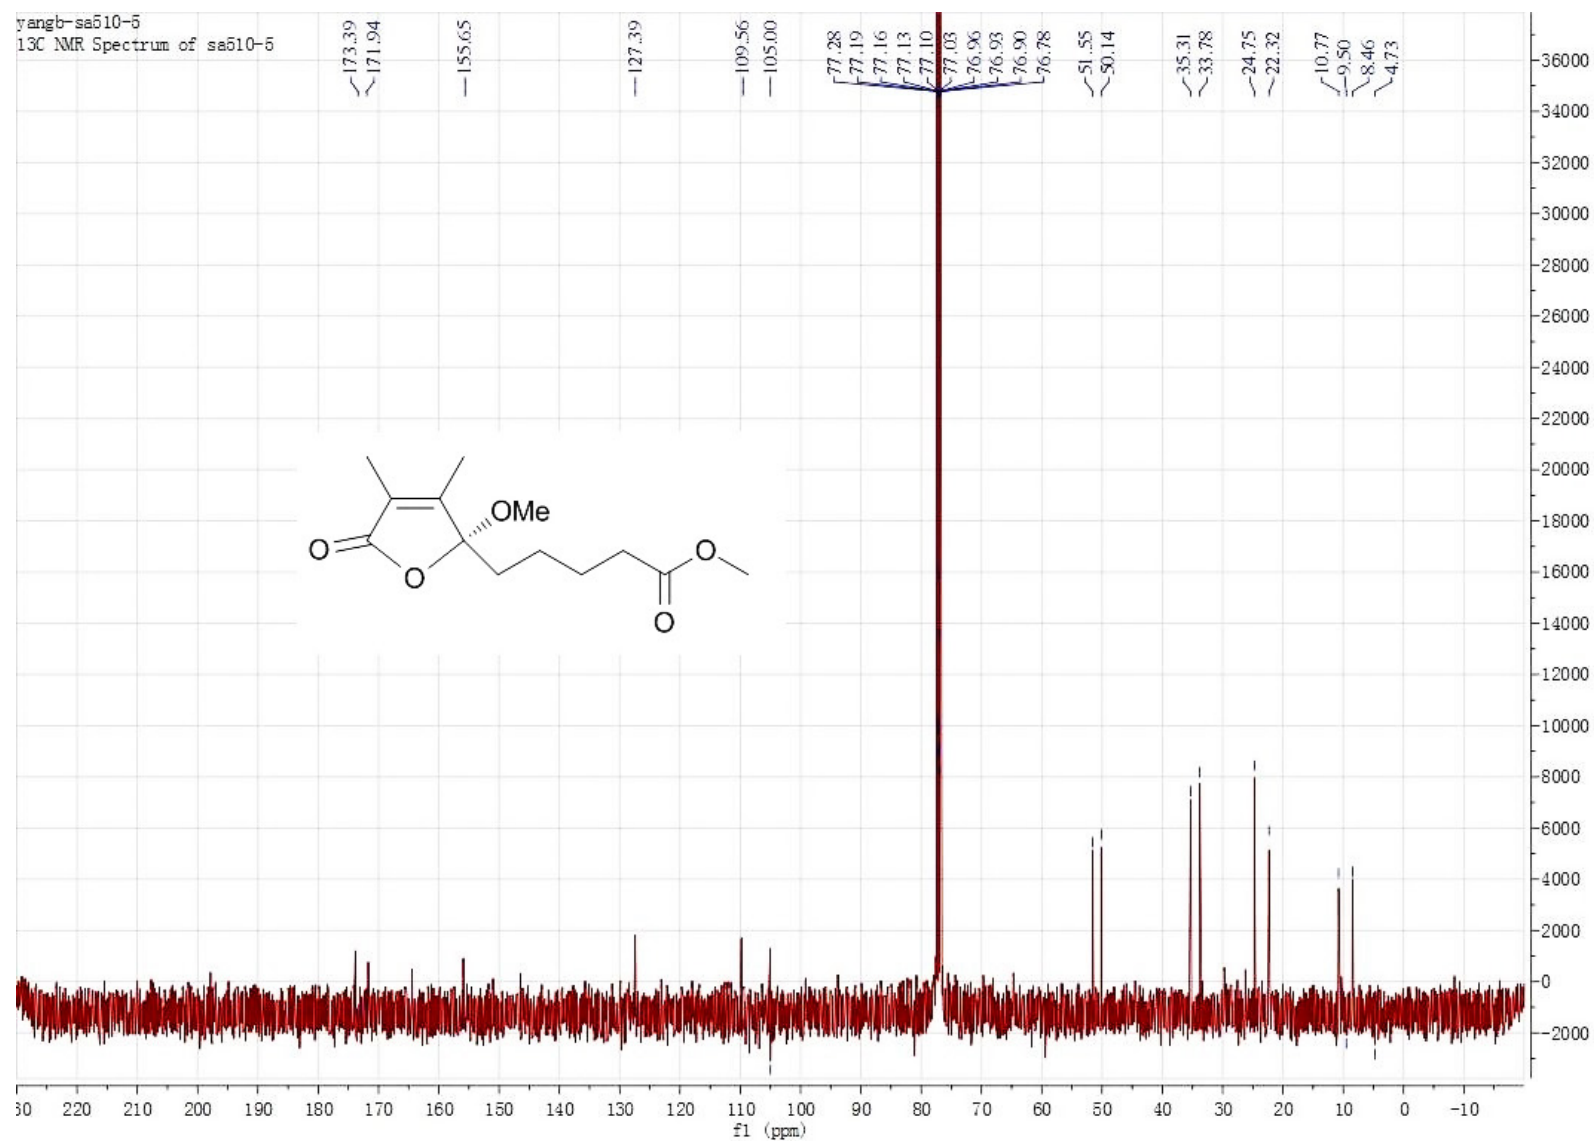

**Figure S34.** HSQC Spectrum of compound 7 in CDCl<sub>3</sub>.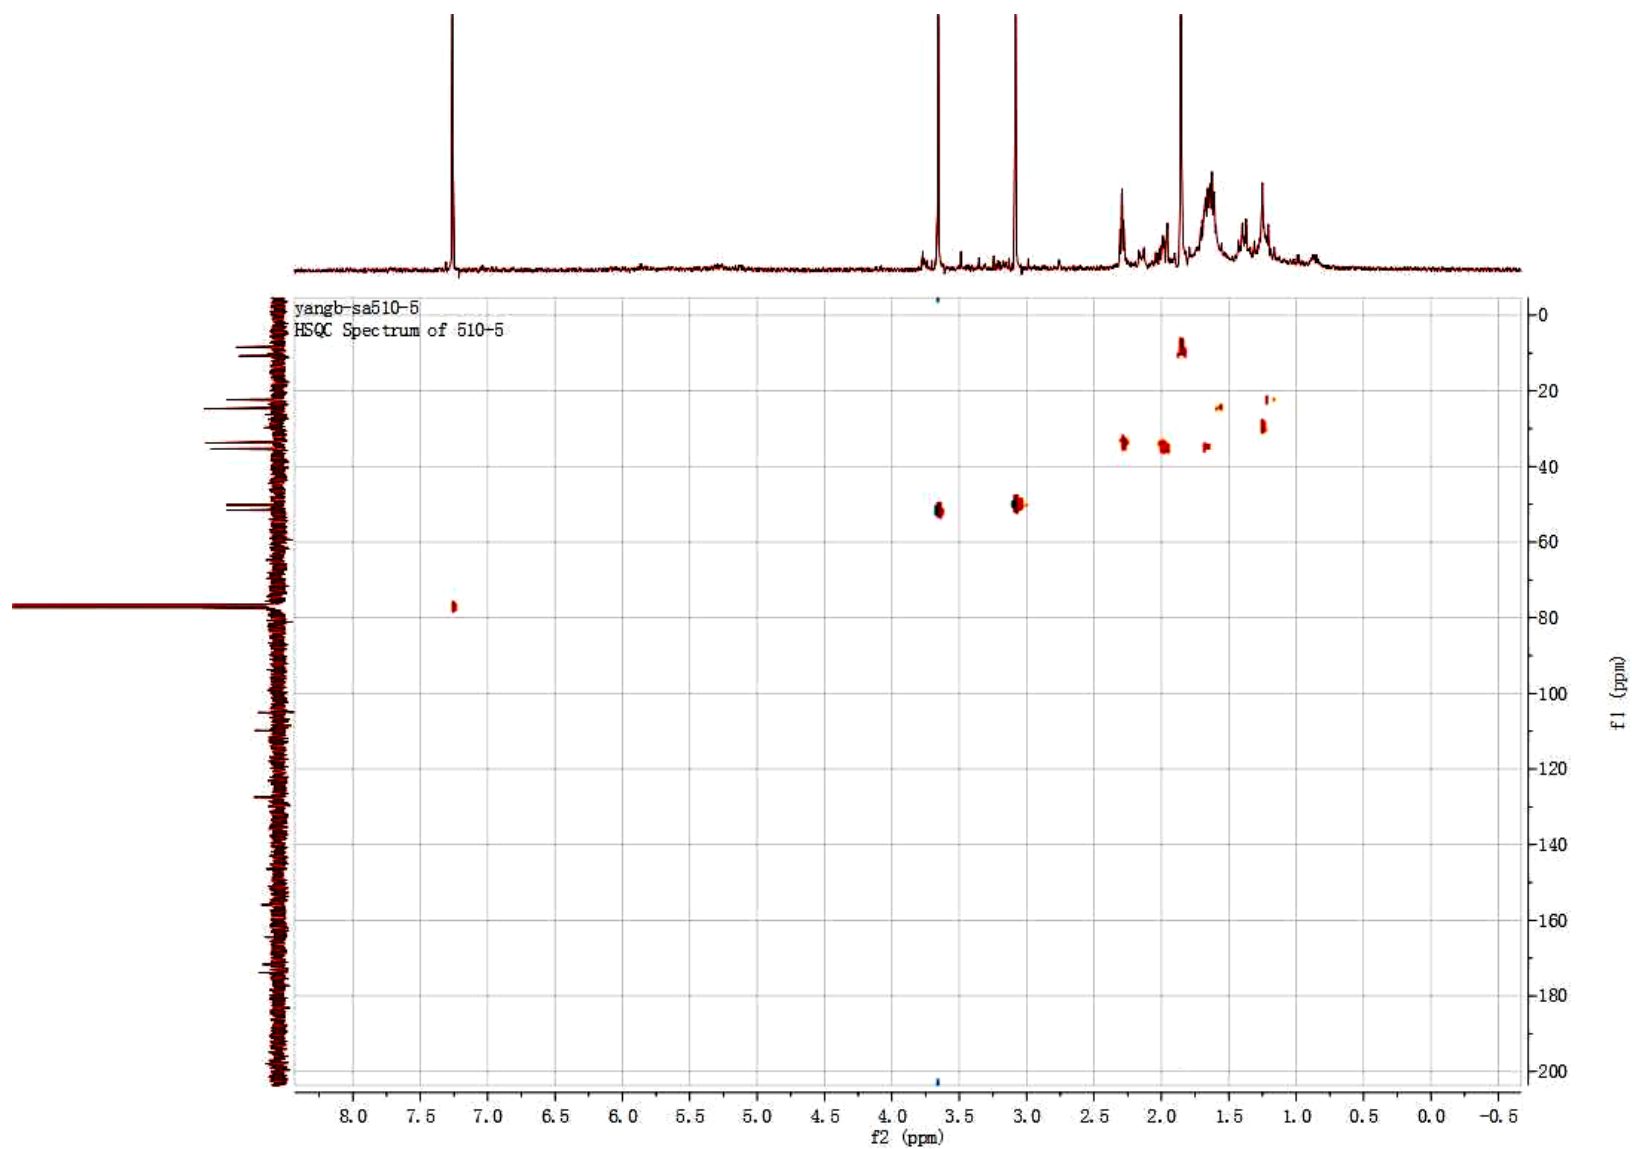

**Figure S35.** HMBC Spectrum of compound **7** in CDCl<sub>3</sub>.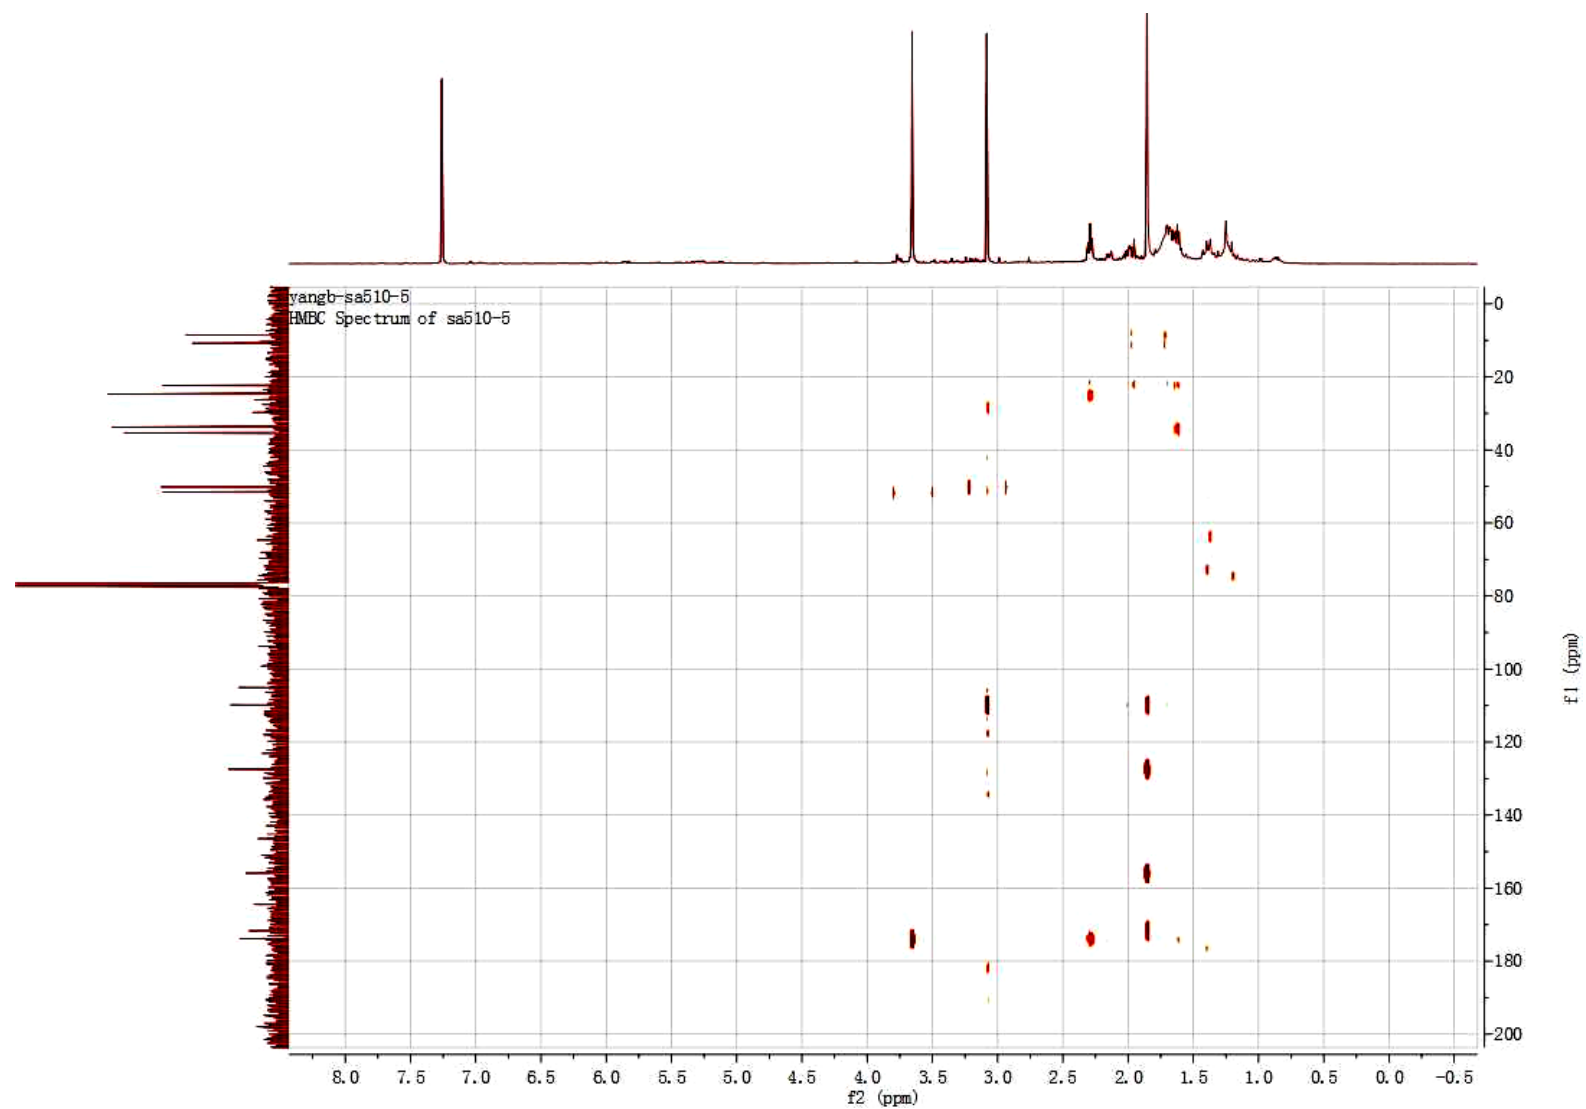

Figure S36. ESIMS spectrum of compound 7.

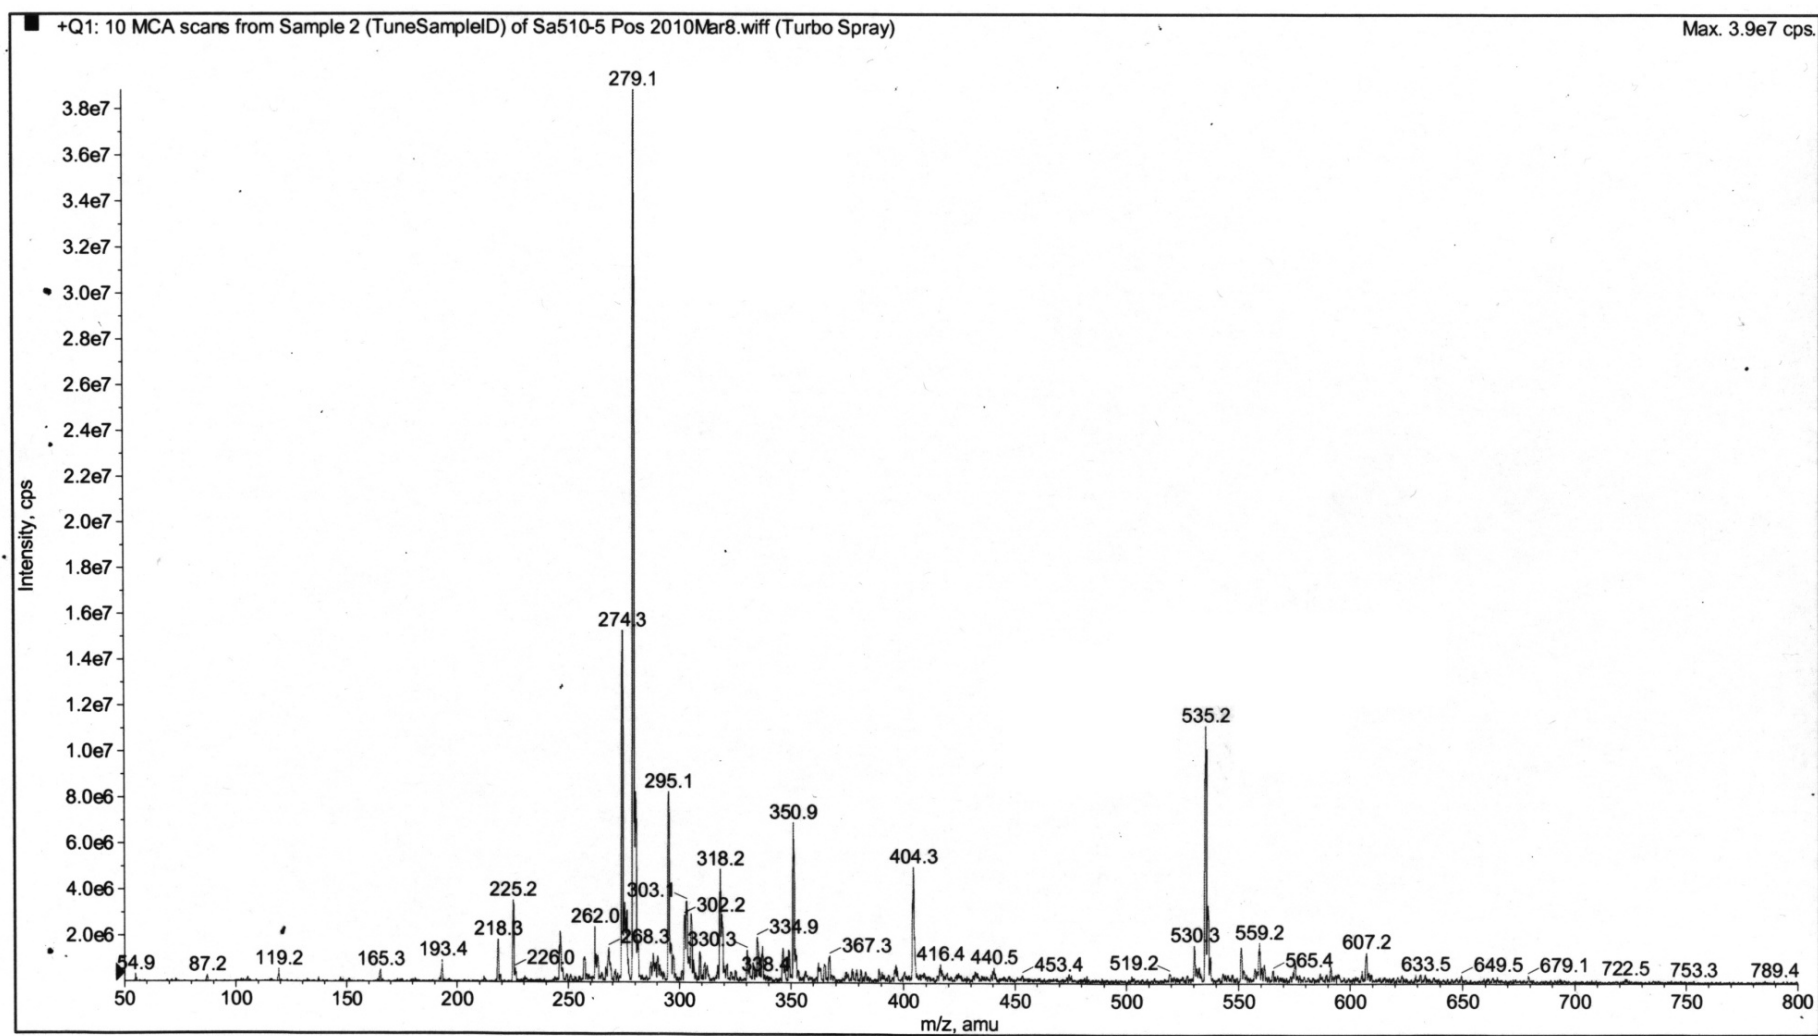

**Figure S37.**  $^1\text{H}$  NMR Spectrum (500 MHz) of compound **8** in  $\text{CDCl}_3$ .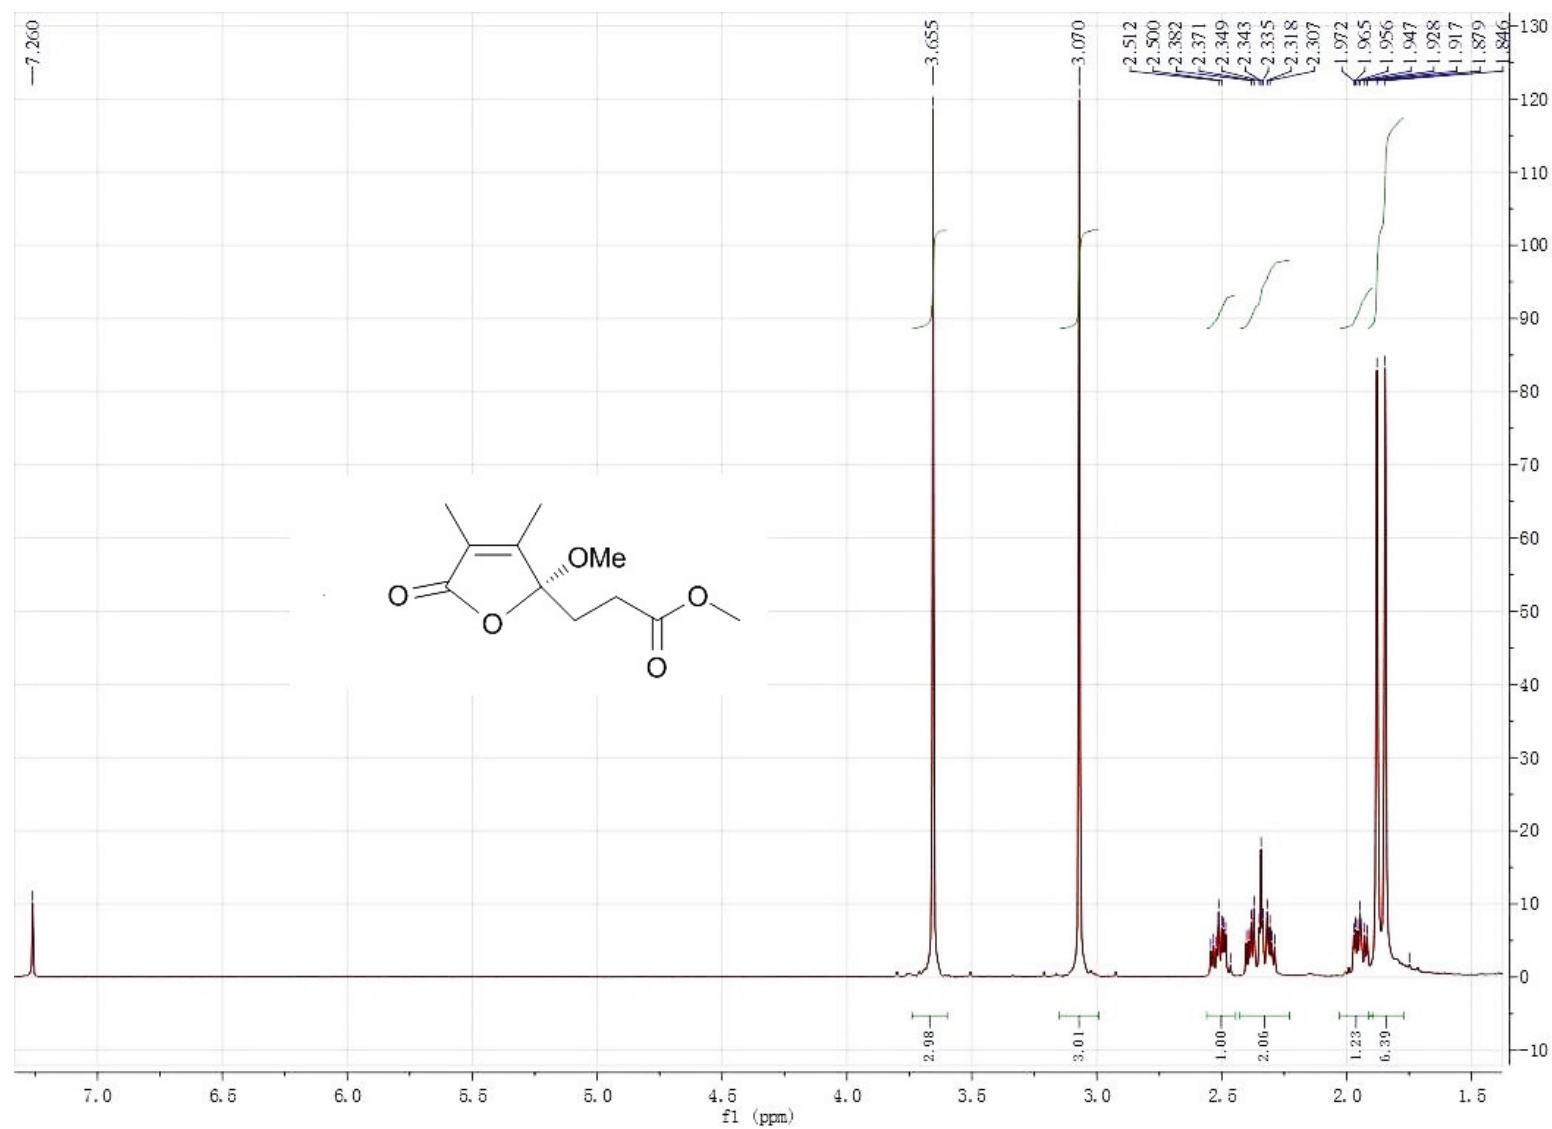

**Figure S38.**  $^{13}\text{C}$  NMR Spectrum (125 MHz) of compound **8** in  $\text{CDCl}_3$ .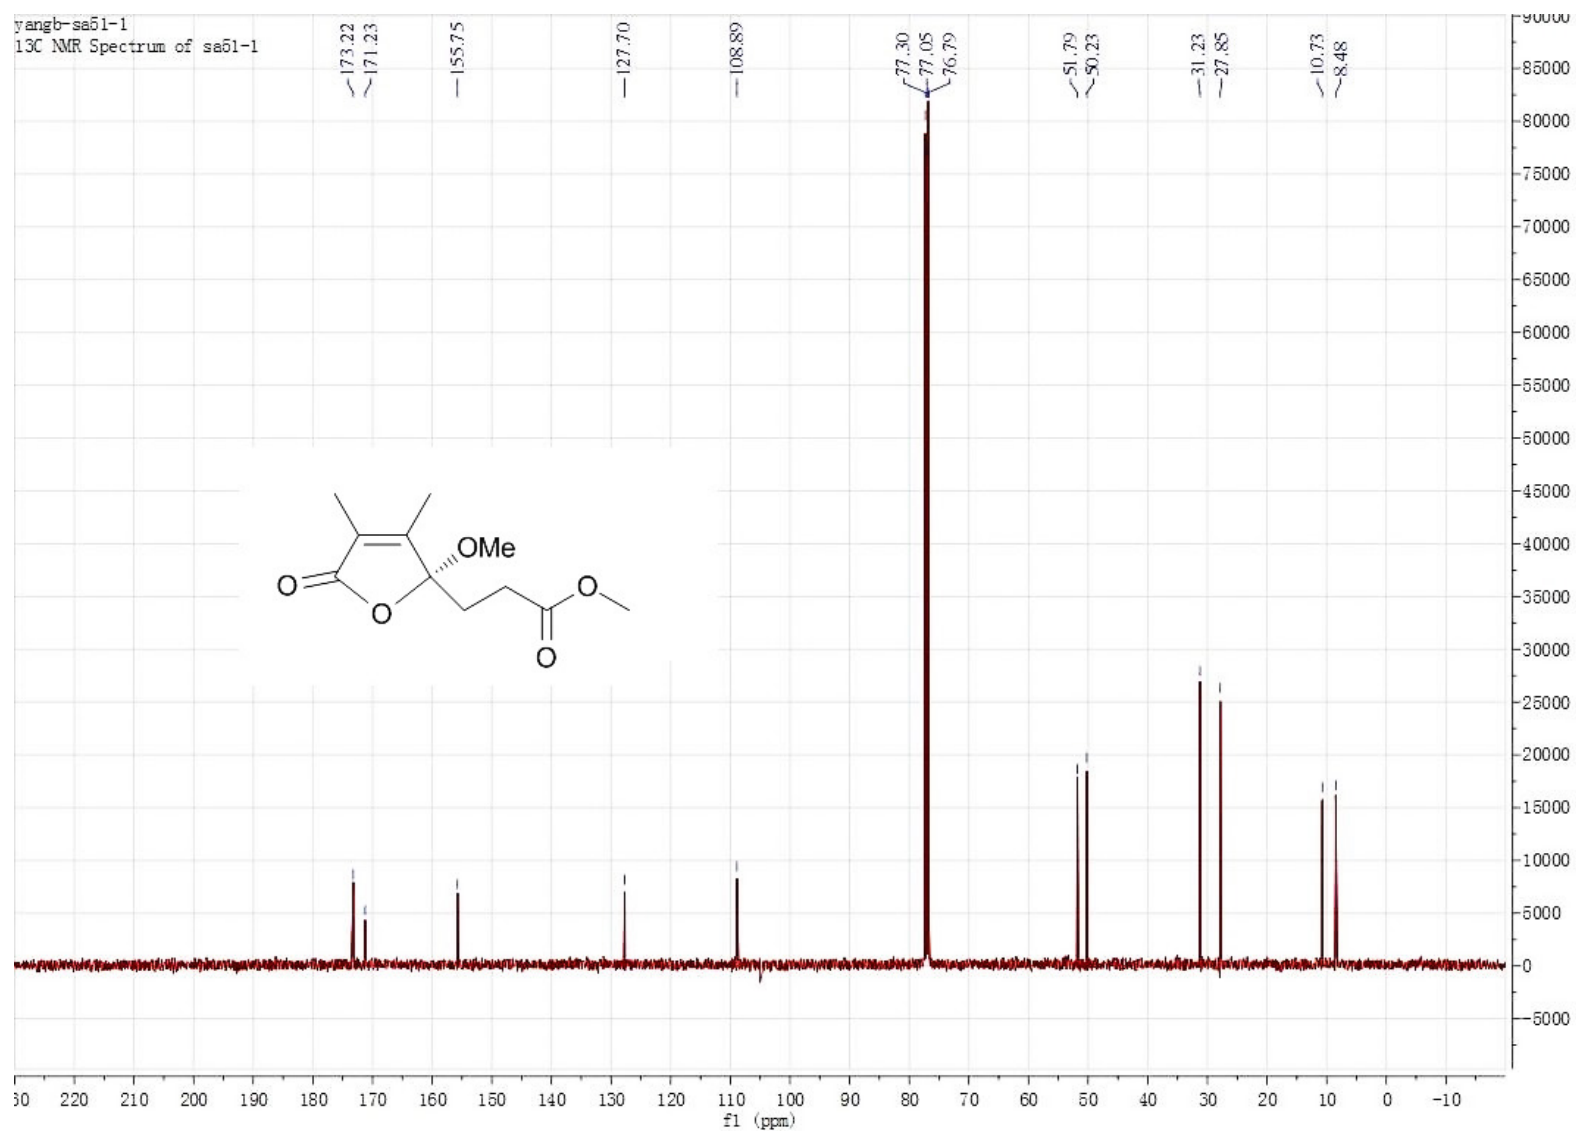

Figure S39. ESIMS spectrum of compound 8.

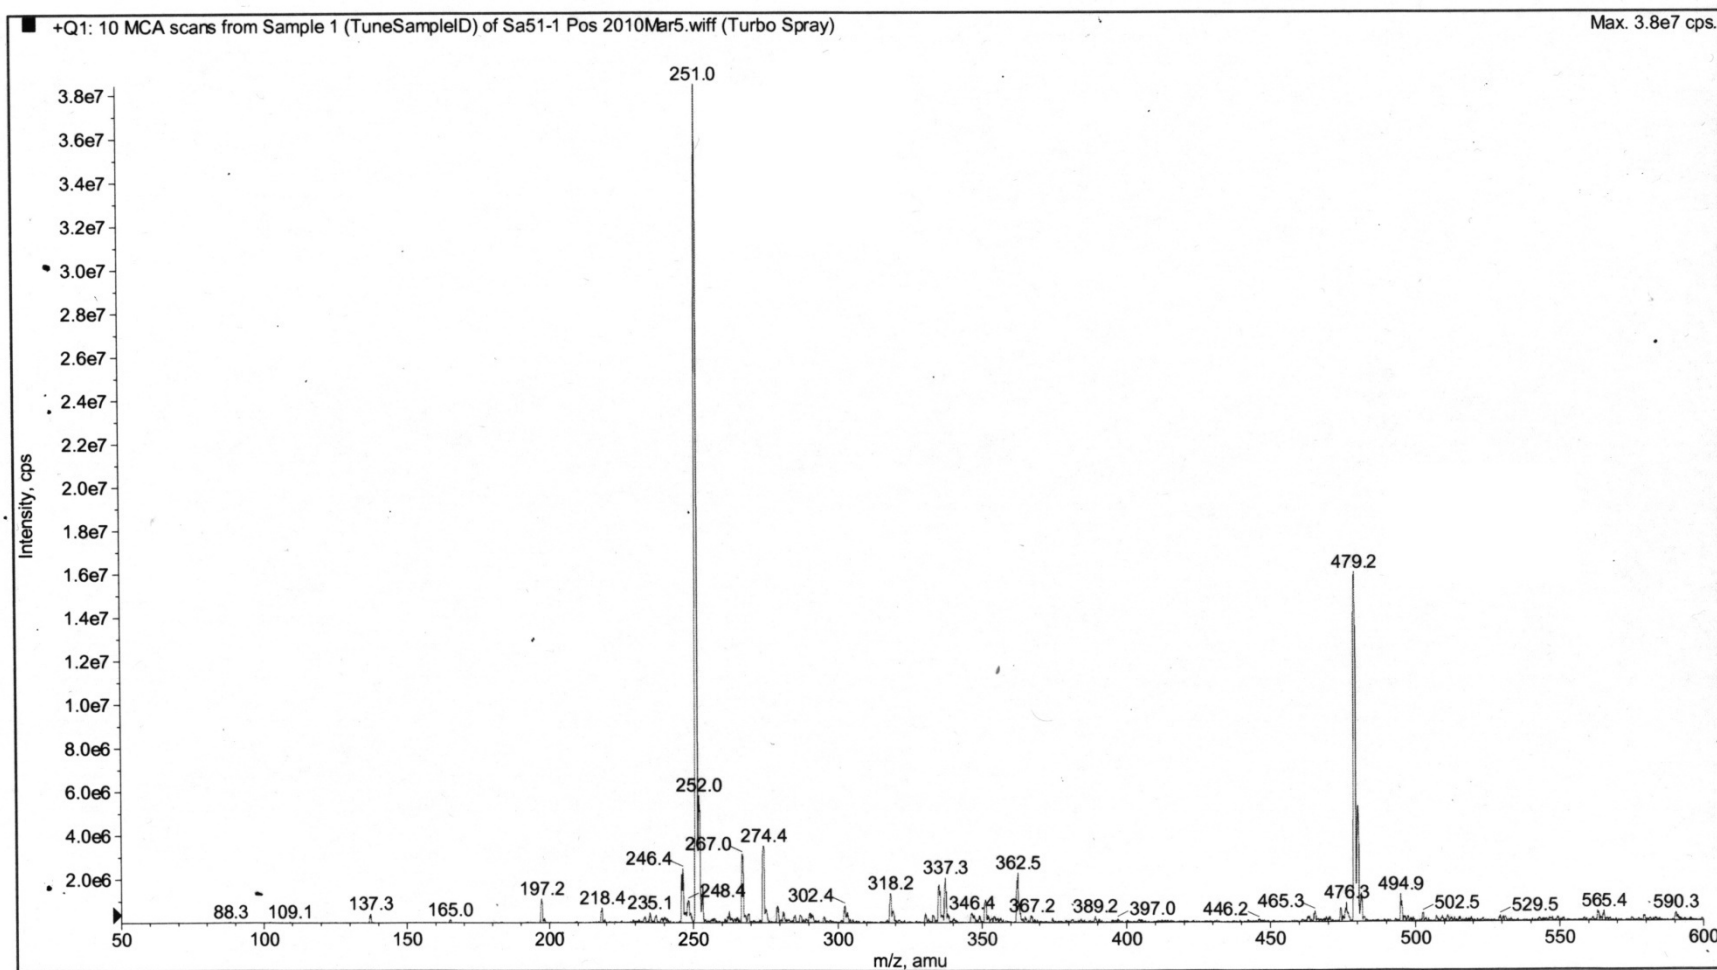

Supplement: s1 [file s1]
